# Supplementary material for: Qualitative accounts from Syrian health professionals regarding violations of the right to health, including the use of chemical weapons, in opposition-held Syria
Source: PubMed Central journal article supplement — BMJ Open. 2018 Aug 5;8(8):e021096. doi: 10.1136/bmjopen-2017-021096 (PMC6078235; doi:10.1136/bmjopen-2017-021096), 2018-08-05
Supplement: bmjopen-2017-021096.draft_revisions.pdf [file bmjopen-2017-021096.draft_revisions.pdf]

# BMJ Open

BMJ Open is committed to open peer review. As part of this commitment we make the peer review history of every article we publish publicly available.

When an article is published we post the peer reviewers' comments and the authors' responses online. We also post the versions of the paper that were used during peer review. These are the versions that the peer review comments apply to.

The versions of the paper that follow are the versions that were submitted during the peer review process. They are not the versions of record or the final published versions. They should not be cited or distributed as the published version of this manuscript.

BMJ Open is an open access journal and the full, final, typeset and author-corrected version of record of the manuscript is available on our site with no access controls, subscription charges or pay-per-view fees (<http://bmjopen.bmj.com>).

If you have any questions on BMJ Open's open peer review process please email [info.bmjopen@bmj.com](mailto:info.bmjopen@bmj.com)

# BMJ Open

## Health providers' professional accounts of violations of the right to health in Syria – a right denied.

|                               |                                                                                                                                                                                                                                                                                                                                                                                   |
|-------------------------------|-----------------------------------------------------------------------------------------------------------------------------------------------------------------------------------------------------------------------------------------------------------------------------------------------------------------------------------------------------------------------------------|
| Journal:                      | <i>BMJ Open</i>                                                                                                                                                                                                                                                                                                                                                                   |
| Manuscript ID                 | bmjopen-2017-021096                                                                                                                                                                                                                                                                                                                                                               |
| Article Type:                 | Research                                                                                                                                                                                                                                                                                                                                                                          |
| Date Submitted by the Author: | 18-Jan-2018                                                                                                                                                                                                                                                                                                                                                                       |
| Complete List of Authors:     | Footer, Katherine; Johns Hopkins University Bloomberg School of Public Health,<br>Clouse, Emily; Johns Hopkins University Bloomberg School of Public Health<br>Raya, Diana; Syrian Medical Association<br>Zaher Sahloul, Mohammed; University of Illinois at Chicago College of<br>Medicine<br>Rubenstein, Leonard; Johns Hopkins University Bloomberg School of Public<br>Health |
| Keywords:                     | Health workers, Right to Health, Syria, Conflict                                                                                                                                                                                                                                                                                                                                  |
|                               |                                                                                                                                                                                                                                                                                                                                                                                   |

SCHOLARONE™  
Manuscripts

View Only

**Title:** Health providers' professional accounts of violations of the right to health in Syria – a right denied.

**A. Author and co-author names**

Katherine H.A. Footer<sup>1,2,3\*§</sup> Emily Clouse<sup>1\*</sup> Diana Rayes<sup>2,3</sup> Zaher Sahloul<sup>3</sup> Leonard Rubenstein<sup>1,2,3</sup>

(1) Department of Health Behavior and Society, Johns Hopkins Bloomberg School of Public Health, Baltimore, MD, U.S.A.

(2) Department of Epidemiology, Johns Hopkins Bloomberg School of Public Health, Baltimore, MD, U.S.A.

(2) Center for Public Health and Human Rights, Johns Hopkins Bloomberg School of Public Health, Baltimore, MD, U.S.A.

(3) The Syrian American Medical Association, Washington D.C., U.S.A.

\* To denote joint first authorship

§ Corresponding Author

**B. Corresponding Author**

Katherine H. A. Footer

Assistant Scientist

Department of Epidemiology &

Department of Health Behavior and Society

Johns Hopkins Bloomberg School of Public Health

615 N. Wolfe St. and 624 N Broadway St.

Baltimore, MD 21205

[kfooter1@jhu.edu](mailto:kfooter1@jhu.edu), 442-287-8777

**C. Full names, institutions, city and country of co-authors**

Emily Clouse, MSc-PH

Research Program Manager

Department of Health Behavior and Society

1  
2  
3 Johns Hopkins School of Public Health  
4  
5

6 Baltimore, MD, 21205

7 [eclosure@jhu.edu](mailto:eclosure@jhu.edu)  
8  
9

10  
11 Diana Rayes, MHS

12 Project Coordinator, Syrian American Medical Society

13 Gaziantep, Turkey

14 [drayes1@jhu.edu](mailto:drayes1@jhu.edu)  
15  
16

17  
18  
19  
20 Mohammed Zaher Sahloul, M.D.

21 Associate Clinical Professor

22 College of Medicine

23 University of Illinois

24 Chicago IL, USA

25 [Sahloul@medglobal.org](mailto:Sahloul@medglobal.org)  
26  
27

28  
29  
30  
31 Leonard Rubenstein, LLM

32 Senior Scientist

33 Department of Epidemiology

34 Johns Hopkins School of Public Health,

35 Baltimore, MD, 21205

36 [lrubenstein@jhu.edu](mailto:lrubenstein@jhu.edu)  
37  
38

#### 39 **D. Key words for indexing**

40 right to health; conflict, health workers, Syria  
41  
42

#### 43 **E. Word Count** (excluding title page, abstract, references and tables)

44 4,109  
45  
46  
47  
48  
49  
50  
51  
52  
53  
54  
55  
56  
57  
58  
59  
60

## Abstract

Objectives: To explore the impact of the conflict in Syria on health care through the experiences of health care providers using a public health and human rights lens.

Design: A qualitative study using semistructured interviews using a thematic analysis approach.

Setting : Interviews were conducted at a medical relief organization in Gaziantep, Turkey

Participants: We examined data from 29 semi-structured in-depth interviews with qualified health professionals with current or recent work-related experience in opposition-controlled areas of Syria.

Results: Findings highlight the health worker experience of attacks on health infrastructure and services in Syria and consequences in terms of access and scarcity in availability of essential medicines and equipment. Quality of services is explored through physicians' accounts of the knock on effect of shortages of equipment, supplies, and personnel on the right to health and its ethical implications. Health workers themselves were found to be operating under extreme conditions, in particular responding to the most recent chemical attacks that occurred in 2017, with implications for their own health and mental wellbeing.

Conclusions: The study provides unique insight into the impact war has had on Syrian's right to health through the accounts of Syrian health professionals, with continuing relevance to the current conflict and professional issues facing health workers in conflict settings.

## Strengths and Limitations of the Study

- This study uniquely explores the experiences of health care providers providing health care during the current conflict in Syria.
- The study revealed the ways in which the conflict has impacted health providers ability to provide health care in accordance with patients right health.
- The findings have implications for capacity building to counter the challenges faced by Syria's health professionals.

- Interviews were limited to the experiences of a small sample of health workers working in conflict affected regions of Syria.

## 1. Background

The ongoing civil war in Syria has created the direst humanitarian crisis of our time. Syria's health care system has been decimated and the healthcare community targeted as part of an ongoing military strategy by the Syrian government, now supported by Russian air power.<sup>1</sup> Although initiatives exist to assist health providers operate in insecure environments,<sup>2,3</sup> little research has unpacked the operational, professional, and personal challenges health providers face when operating in such a violent setting.

Human rights organisations and UN agencies have placed a spotlight on the Syrian Government's assault on health care.<sup>4</sup> Physicians for Human Rights documented 478 attacks on medical facilities and the killing of 830 medical personnel since the start of the conflict in 2011, the vast majority by the Assad regime.<sup>4</sup> At the commencement of this research in 2014, nearly 75% of hospitals and one third of primary care facilities were either not functioning or were significantly restricted in their ability to provide services.<sup>5</sup> The World Health Organization has reported severe shortages of medical supplies, spotty vaccination coverage, lack of capacity to address severe health needs and a critical shortage of health providers.<sup>5</sup> In addition, medical providers have had to respond to the unprecedented use of toxic chemical agents used against civilians since the commencement of the war in December 2012, most recently a sarin gas attack in April 2017 in Syria's northern Idlib province.<sup>6-8</sup>

In Syria the health care context is currently made up of three separate health "systems": the first is run by the Syrian government and is restricted to areas it controls; a second system is comprised of an ad hoc collection of local and international non-governmental organisations (NGOs), local committees, and relief agencies operating primarily within opposition-controlled areas; and a third system is maintained by the Islamic State (ISIS) in areas it controls.<sup>9</sup>

Health care workers operating within opposition-controlled areas have struggled to provide services in the midst of a multi-dimensional crisis.<sup>10</sup> A protracted war on the public health infrastructure has led to inadequate access to basic necessities and a unprecedented humanitarian crisis.<sup>11-15</sup> It is in this setting that health providers must make daily decisions at the

1  
2  
3 micro, meso, and macro-level of healthcare provision (e.g., who receives care, which hospital to  
4 repair, where to target supplies).

5  
6 Obligations under international humanitarian law include requirements not to attack or  
7 interfere with health care services.<sup>16</sup> Obligations under the human right to health include  
8 ensuring the availability, accessibility, acceptability, and quality of health facilities, goods and  
9 services.<sup>17</sup> Drawing on the right to health as a key conceptual framework, this study explores the  
10 complex challenges health workers face in providing care when health care services and  
11 personnel are themselves subjected to violence and forced to operate in the midst of ongoing  
12 human rights violations and war crimes.  
13  
14  
15  
16  
17  
18  
19

## 20 21 **2. Methods**

22 Qualitative research was conducted in October 2014 and July-August 2017 with health  
23 care providers working in northwest Syria. The study sought to: 1) describe attacks and  
24 interferences with healthcare occurring in opposition-controlled areas of Syria; and 2) explore  
25 the challenges health workers face and the consequences for civilian's right to health.  
26  
27  
28  
29  
30

### 31 **2.1. Setting**

32 Qualitative fieldwork was collected in Gaziantep, Turkey, a city 97 kilometers north of  
33 Aleppo, Syria, as well as by secure video link with health workers inside Syria. Gaziantep is host  
34 to Syrian and international NGOs, and is a humanitarian hub for cross-border support. Among  
35 the Syrian NGOs operating out of Gaziantep is the Syrian American Medical Society (SAMS),  
36 who partnered with the Johns Hopkins Bloomberg School of Public Health (JHSPH) on this  
37 project.  
38  
39  
40  
41  
42  
43

### 44 **2.2. Study Population**

45 Health professionals working in Syria in 2014 and 2017 were interviewed, either in  
46 person while in Gaziantep to attend a SAMS medical training workshop (2014), or from within  
47 Syria (2017) using Wire, an application that allows for secure/encrypted communication. All  
48 participants were identified through purposive sampling methods, taking account of key  
49 informants' specialized knowledge and unique perspectives. Eligibility criteria required  
50 participants to be aged 18 years or older and a qualified health professional with current or recent  
51  
52  
53  
54  
55  
56  
57  
58  
59  
60

1  
2  
3 work-related experience in opposition-controlled areas of Syria. Participants were told the  
4 purpose of the study and how the information provided would be used and that participation was  
5 voluntary. Permission was sought and in all but one case granted for audio recording; no names  
6 or other identifiers were collected. With the exception of respondents who were fluent in  
7 English, interviews were conducted in Arabic either through an Arabic translator or Arabic-  
8 speaking interviewer. The 2014 interviewer (LR) concluded with a final sample of 27 when no  
9 new themes emerged. Three of the interviews conducted were excluded from this analysis due to  
10 poor audio quality, incomplete interview, or declining audio recording. An additional five  
11 interviews were conducted in 2017 by an Arabic speaking interviewer (DR). Audio-recordings  
12 were transcribed verbatim and triangulated with additional notes.  
13  
14  
15  
16  
17  
18  
19  
20  
21

### 22 2.3. Measurement and Analysis

23  
24 Interviews followed a semi-structured interview guide that was developed in accordance  
25 with the aims of this study. This analysis reviews the challenges health care providers face and  
26 the constraints on patient care when approached through a right to health lens of accessibility,  
27 availability, and quality of care.  
28  
29

30  
31 Two independent reviewers (EC, KF) conducted the coding and analysis using an  
32 inductive and deductive approach to coding that relied on a priori topics, while still allowing for  
33 the emergence of new themes through a process of thematic analysis.<sup>18</sup> First, researchers read  
34 through the transcripts to familiarize themselves with the data, three transcripts were then open-  
35 coded to delineate established and emergent categories. Coding categories were based on a priori  
36 topics around the right to health, and new concepts that emerged from the data. The researchers  
37 compared coded transcripts to identify discrepancies and further define the coding scheme. The  
38 codes were reviewed by KF, EC, and LR. Clean transcripts were imported into Hyperresearch  
39 3.7.2 and coded using the final scheme developed by the analysts.  
40  
41  
42  
43  
44  
45  
46  
47

### 48 2.4. Ethical Approval

49  
50 The JHSPH Institutional Review Board and a local review board approved research protocols for  
51 the 2014 and 2017 interviews. Study participants provided informed consent to be interviewed.  
52 All participants in accordance with IRB procedures were explained the purpose of the research,  
53 were free to decline to participate, and told of their liberty to withhold information they were  
54  
55  
56  
57  
58  
59  
60



uncomfortable to give. Finally, we assured and accorded them privacy, anonymity, and confidentiality.

### 3. Results

#### 3.1. Sample characteristics

Of the 29 participants in this sample, all but two were Syrian male health professionals. The non-Syrian health professionals were female Americans who had recently worked in Syria, and were interviewed in 2014. The respondents had varied experience levels and medical professional backgrounds and had experience working in occupation-controlled areas of northwest Syria. (Table 1) Below we present key findings emerging from our analysis of accounts of medical professionals providing healthcare in Syria.

Table 1 – Participant Demographics

|                           |                      |    |
|---------------------------|----------------------|----|
| <i>Total Participants</i> |                      | 29 |
| <i>Gender</i>             |                      |    |
|                           | Male                 | 27 |
|                           | Female               | 2  |
| <i>Nationality</i>        |                      |    |
|                           | Syrian               | 27 |
|                           | American             | 2  |
| <i>Profession</i>         |                      |    |
|                           | Surgeon              | 13 |
|                           | Cardiologist         | 1  |
|                           | Anesthesiologist     | 2  |
|                           | Pediatrician         | 1  |
|                           | Nurse                | 4  |
|                           | Dentist              | 2  |
|                           | Technician           | 4  |
|                           | Health Co-ordinators | 2  |
| <i>Governate</i>          |                      |    |
|                           | Idlib                | 13 |
|                           | Aleppo               | 7  |
|                           | Latakia              | 3  |
|                           | Hama                 | 4  |
|                           | Rif Dimashq          | 2  |

### 3.2. Availability

The targeting of hospitals and ambulances in opposition-controlled and besieged areas has dramatically decreased availability of health care. Participant descriptions capture both indiscriminate and targeted attacks, including the use of mortar shells, TNT barrel bombs and nerve agents, often with multiple attacks on the same facility. A physician described constant bombardment of a hospital in Latakia:

*“Interviewer: How many times has the hospital been hit in three months?”*

*Respondent: Almost 90 times. It's on a daily basis.... The furthest time was 100 meters. Sometimes it's 10 meters, 15 meters away from the hospital.” (Interview 8, 2014)*

Health care workers have responded to the constant attacks and attempts to obliterate healthcare availability by developing methods to protect themselves, their patients, and their equipment. In response, nearly all participants described a common strategy of placing hospitals underground. However, doctors explained that even fortified hospitals underground or in a cave are vulnerable, in particular if exposed to a chemical attack, especially to heavy sarin gas:

*“We operate in a fortified hospitals underground, but with chemical attacks all hospital are susceptible to the chemical attacks and getting destroyed.” (Interview 1, 2017)*

The ongoing conflict has restricted movement and limited the availability of health supplies. Medicines and equipment for trauma cases and the management of chronic diseases, and treatable childhood diseases were highlighted as being in short supply:

*“Because there are no vaccinations we now see polio and measles. All these diseases are different, some diseases need specific medication, and we haven't any.” (Interview 12, 2014)*

In particular participants describing the medical response to the 2017 chemical attacks, highlighted that hospitals lacked sufficient supplies of appropriate antidotes to treat the nerve agents civilians were exposed to:

*“Our hospital wasn't equipped to treat chemical attacks, since we thought that chemical weapons were eradicated since 2013. Back then we brought big amount of Atropine to treat chemical attack victims but the medication expired and we never used it.” (Interview 1, 2017)*

The provision of medical supplies and medications, including protective equipment for chemical attacks, improved by 2017 through the work of humanitarian organisations, but all participants described the continued scarcity of life-saving, protective equipment and inadequate availability

1  
2  
3 of specialist care. Given the high volume of serious traumatic injuries, availability of essential  
4 equipment and qualified physicians is essential to protect the right to health of those injured by  
5 conflict. However, in the absence of resources and training, physician accounts highlighted  
6 altered standards of care implemented in order to preserve life:  
7  
8  
9

10 *“Lack of surgeons caused many cases to either be amputated after treatment, result in death or*  
11 *face complications. A lack of instruments for orthopedic and neurosurgery have also caused*  
12 *many complications. Despite this difficult reality, we are still doing 4,500 surgeries each*  
13 *month.” (Interview 2, 2014)*  
14

15  
16 With respect to the chemical attacks, healthcare workers were also placed at increased risk of  
17 harm due to the lack of availability of appropriate safety equipment when treating patients  
18 exposed to chemical agents:  
19

20  
21 *“Honestly, we still haven’t received fully protective equipment. When the medical staff got*  
22 *affected (and after we saw how people are getting affected even when they thought they were*  
23 *protected) ..., this is when we started using masks but even masks weren’t good*  
24 *enough,..” (Interview2, 2017)*  
25

### 26 27 3.3. Accessibility

28  
29 Attacks on hospitals during the 2017 sarin attacks limited patient access to hospitals at precisely  
30 the moment that it was most critical:  
31

32 *“We witnessed the aircraft striking the city 6 times, firing exactly 11 missiles. Once the aircraft*  
33 *was gone, we went to the hospital and we saw that the air strikes were targeting the hospital*  
34 *where the chemical attack victims were transferred to get treatment. By the time we got to the*  
35 *hospital, we found that the whole staff was gone from fear and a big part of the hospital was*  
36 *destroyed. One patient was undergoing a surgery, his blood was still on the operating table.”*  
37 *(Interview 3, 2017)*  
38  
39

40  
41 Even where hospitals are not completely destroyed, the impact of bombardments on health care  
42 access is profound, with many participants describing regular interruptions and closures. Fear of  
43 attacks on hospitals has an indirect but major impact on patient access to health services. As a  
44 general practitioner explained:  
45

46  
47 *“Lots of people don't dare to go to the hospital, because they know that the hospital has been*  
48 *targeted by the bombardment – five, six times. It's only those who are in grave need who will go*  
49 *to the hospital.” (Interview 11, 2014)*  
50  
51

52  
53 For civilians who have been injured in attacks or who are unable to travel to a hospital for other  
54 reasons, medical care access is dependent on first responders or civilian transportation. However,  
55

1  
2  
3 ambulances are in short supply, in part due attacks on them, and the risk to first responders is  
4 great, as they are easy targets for aerial attacks:

5  
6 *“There were many cases when ambulance drivers have been attacked, especially at night in the*  
7 *dark. The aircraft see the lights of the ambulance and attack it.”* (Interview 2, 2014)  
8  
9

10 At times of acute crisis, such as the recent chemical attacks, lack of prompt access to facilities  
11 owing to long transport times and restricted capacity, has meant many additional civilian  
12 fatalities:  
13

14  
15 *“There is no clear strategy for the health system tactically or operationally to deal with the*  
16 *number of injuries, and nerve injuries are a new topic for us. If there had been a medical point*  
17 *nearby, maybe one or two kilometers away from our hospital, we would have saved a lot of*  
18 *people.”* (Interview 5, 2017)  
19  
20

21 Finally, the difficulties and dangers of transporting supplies and equipment into besieged areas  
22 was highlighted as another access issue that poses severe risks for health workers. One  
23 participant reported that 28 staff from their hospital had been arrested while attempting to carry  
24 medicines and supplies to their hospital:  
25  
26

27  
28 *“Taking medicine into [town name], is a crime that is punished...they go to prison and nobody*  
29 *knows after that, of course it’s torture.”* (Interview 7, 2014)  
30  
31

### 32 3. 4. Quality

33 Make-shift hospitals (known as field hospitals) emerged in opposition-controlled areas as a result  
34 of the assault on medical care in rebel held areas of Syria, replacing hospitals and clinics  
35 formerly serving Syria’s population. These field hospitals are located in former factories, farms,  
36 and schools. Although Syrian health workers and their supporters provide supplies and  
37 equipment to these field hospitals, in many of them it is extremely difficult to maintain standards  
38 of care, especially at times of mass casualties from attacks, as evidenced in health care workers’  
39 descriptions:  
40  
41  
42  
43  
44

45  
46 *“Everything is allowed in a field hospital. You can put the intravenous line in with alcohol - we*  
47 *do it all the time. You can do operations without sterilized matters, without anesthesia*  
48 *machines.”* (Interview 15, 2014)  
49

50 During the 2017 chemical attacks, some hospitals that had been closed down for safety reasons  
51 were reopened to deal with the overwhelming number of casualties:  
52

53  
54 *Most of the hospital was destroyed [by an attack on April 2<sup>nd</sup> 2017] and it was out of service, but*  
55 *the fact that the other hospital wasn’t capable of dealing with the big number of patients, they*  
56  
57  
58  
59

1  
2  
3 *had to re-activate the emergency department even though it was very risky, so they can receive*  
4 *some patients. (Interview 3, 2017)*  
5

6  
7 Participants also reported that because of the high number of trauma cases, patients with other  
8 medical conditions were often left untreated. During the chemical attacks triage decisions led to  
9 a lack of attention to the the most vulnerable, including large numbers of affected children.  
10  
11 Participants' accounts highlight that medical personnel such as dentists and anesthesiology  
12 technicians are acquiring new skills to meet the chronic shortage of surgeons and  
13  
14 anesthesiologists, because so many health workers have fled Syria. Here a dentist describes how  
15 he undertook maxillofacial surgeries:  
16  
17

18 *[Interviewer: Part of your dental training was in that kind of surgery?]* "No, it was just a  
19 *minimal part of it, I was given just an overview of these types of surgeries, but out of necessity*  
20 *I've had to do these surgeries."* (Interview 1, 2014)  
21  
22  
23

24 Participants involved in treating patients in the most recent chemical attacks were frank in  
25 describing how ill prepared the medical sector were, with training and equipment inadequate to  
26 meet the demands of the overwhelming crisis. This resulted in a highly variable quality of care  
27 at medical facilities:  
28  
29

30 *I think that medical providers barely saved 1-2% of the chemical attack victims, because the*  
31 *situation is totally different, we have no prior training, medical staff or equipment to deal with it.*  
32 *I believe what we were able to provide was too little. (Interview 1, 2017)*  
33  
34  
35

36 The continued outward migration of healthcare providers from Syria, and resulting shortage in  
37 quality clinical care has also been exacerbated by the relentless targeting of healthcare services  
38 and recent chemical attacks:  
39  
40

41 *"Some of healthcare providers decided to stay in Turkey and not to go back to Syria until things*  
42 *are clearer, others said that the use of chemical weapons is something that will never stop. We*  
43 *won't be able to provide much and we might turn into patients ourselves with no treatment, so*  
44 *medical staff were evaluating how beneficial they can be over there"* (Interview 3, 2017)  
45  
46

### 47 3.5. Health Worker Demoralization

48  
49 The constant attacks to health infrastructure and the barriers to health care access, availability,  
50 and quality that result, impact not only civilians who seek treatment but also the health workers  
51 who provide care. Interviews highlighted a complex constellation of factors that impact health  
52 workers' day to day working conditions. As this participant described:  
53  
54  
55  
56  
57  
58  
59  
60

1  
2  
3 *“You are working with bad health supplies and instruments, and short of financial support. We*  
4 *have also a great danger of being killed because of bombing all the time. All those factors make*  
5 *a great pressure on doctors... Especially the doctors that work for health organisations and in*  
6 *the opposition, they are under focus from the regime.” (Interview 2, 2014)*

7  
8 Conditions remain violent, with participants interviewed following the 2017 chemical attacks  
9  
10 drawing attention to the rising death toll among doctors and enduring sense of fatalism among  
11  
12 those who remain:

13 *The past year Dr. [name omitted] passed away in April [exposed to chemical agents while*  
14 *treating a patient] and another anesthesiologist passed away. There have been about 5-6 deaths*  
15 *from our medical staff within the organization. The truth is that work in the northern countryside*  
16 *is considered suicide. (Interview 5, 2017)*

17  
18  
19 The stress of providing care during war is made worse because of the scarcity of health workers.  
20  
21 Many participants reported that they work 24-hour days because there are no other staff to  
22  
23 relieve them of their duties. Additionally participants described often feeling useless because of  
24  
25 the number of people they could not assist. A participant explained health worker’s relentless  
26  
27 workload, coupled with the extreme trauma related injuries they respond to:

28 *“Sometimes it takes them from 8:00 in the morning till 12:00 in the evening doing operations*  
29 *only. And because of the lack of the staff they are obliged to stay in the hospital, and moving*  
30 *from one operation to another one, and sometimes they don't find time to have their lunch or to*  
31 *eat even. And this pressure they live under, and all the causalities they see, all the injuries, the*  
32 *beheaded, the limbs and everything, puts them under very heavy pressure.” (Interview 20, 2014)*

33  
34  
35 Participants described the most recent chemical attacks as having a major impact on morale  
36  
37 among health workers and their sense of isolation:

38 *“Every single life we saved in the last year ended up dead in the chemical attack. At the end,*  
39 *death has become normal to the rest of the world, no one is reacting.” (Interview 1, 2017)*

40  
41  
42 *“It had a big effect in creating a hopeless environment, feeling of hopelessness inside each*  
43 *healthcare provider.” (Interview 3, 2017)*

44  
45  
46 Participant accounts highlighted the mixed emotions generated by their work, as fear was offset  
47  
48 only by a strong sense of professional commitment:

49 *“Sometimes we have depression. But all of us believe that we must do this job – but all of us are*  
50 *afraid of some point where we're injured or killed...” (Interview 13, 2014)*

51 In the absence of external support health workers look to one another; here a participant  
52  
53 describes how they rejoice on days where their work does not bring with it the death of another  
54  
55 colleague:



1  
2  
3 *“After a barrel bomb falls down we start dancing, the Arabian dancing. We are not dead, and if*  
4 *nobody is dead among us, we start dancing.” (Interview 23, 2014)*  
5

6 Finally, another participant pointed to the absence and futility of psychological support and  
7 instead the role of their faith:  
8

9  
10 *“What is good about psychological support after all what we have seen? In general, we don’t get*  
11 *internal nor external psychological support. The staff that held up for 7 years have only God to*  
12 *depend on.” (Interview 2, 2017)*  
13

## 14 15 **Discussion**

16  
17 Participant accounts are consistent with other documentation, which together reveal that  
18 attacks on hospitals and medical providers are targeted and deliberate, and likely constitute war  
19 crimes.<sup>1</sup> The data illustrates how violence against health workers and facilities undermined their  
20 ability to contribute to the realization of the right to health, which imposes on States a number of  
21 core obligations to respect, protect and fulfill the health needs of the population, obligations that  
22 are non-derogable, even in times of conflict.<sup>19,20</sup> The attacks have had far reaching implications  
23 beyond the observable violence of the destruction of and damage to health care facilities.  
24

25  
26 As has been found in other conflicts,<sup>16,21-23</sup> our findings show that in Syria violence  
27 against health care has bred a climate of fear and insecurity, with devastating impacts on health-  
28 seeking behaviors and access, as civilians face difficulties in accessing health facilities, or  
29 choose to avoid them altogether. Participants described how their work to treat a suffering  
30 population was severely impeded by a lack of availability of essential equipment, facilities and  
31 treatments for chronic and infectious disease. Despite their often heroic efforts, they remain ill-  
32 equipped to respond as they believe required to the use of chemical agents as a weapon of war  
33 that endangered and killed patients and providers alike. The challenges of maintaining standards  
34 of quality, interconnected to access and availability, was a central theme of the interviews and  
35 constitutes a daily source of pressure and anxiety for those trying to provide care. Shortages in  
36 staff and equipment, overwhelming numbers of patients, and the limited capacity of field  
37 hospitals has made triage decisions impossibly hard, and coping with the large scale of chemical  
38 weapons attacks in facilities already compromised by violence against them has overwhelmed  
39 medical staffs. Participants reported severe difficulties in meeting their responsibilities to provide  
40 patients with quality care while still maintaining their own safety, especially during the chemical  
41 attacks of 2017. Despite efforts by many organisations to provide supplies, equipment and a safe  
42  
43  
44  
45  
46  
47  
48  
49  
50  
51  
52  
53  
54  
55  
56  
57  
58  
59  
60

1  
2  
3 environment, health workers have been forced to operate in conditions well below any standard  
4 of quality that existed prior to the conflict. The chemical attacks in 2017 show the extent to  
5 which the use of prohibited weapons and extreme resource limitations impair health worker  
6 efforts to provide care.  
7  
8  
9

10 Research on the effects of the Syrian conflict has described the lasting impact the  
11 migration of health workers on health systems and, ultimately, the civilian population remaining  
12 in Syria.<sup>11,14,24</sup> Accounts from both 2014 and 2017 highlight the continued outward migration of  
13 health providers due to violence against them, fear and the psychological toll taken by working  
14 in these circumstances . They also reveal how physician shortages have led to and self-training in  
15 specializations for which doctors on the ground have no official certification. The need for  
16 medical personnel to act beyond their training inevitably has implications for the quality of care  
17 patients receive, and puts health providers not adequately trained under enormous pressure.  
18  
19  
20  
21  
22  
23

24 Since we conducted interviews in 2014, attacks on hospitals and health care workers have  
25 escalated further, leaving health infrastructure in much of opposition-held areas devastated,  
26 forcing more health workers to flee and leaving those who remain subject to dangers of ongoing  
27 violence while having inadequate resources to respond to patient needs despite the efforts of  
28 humanitarian organisations to fill the gap. The augmented findings from the 2017 chemical  
29 attacks illustrate the severity of conditions on the ground. The UN Security Council has called on  
30 Syria to adhere to its legal obligation not to attack health facilities and health workers,<sup>25</sup> to no  
31 avail, and efforts by members of the Council to refer gross violations of international  
32 humanitarian law, including targeting of hospitals and health workers, to the International  
33 Criminal Court, were blocked by Russia.  
34  
35  
36  
37  
38  
39  
40

41 This study shows how important it is both to protect health workers in war and to focus  
42 on the needs of health workers who struggle to continue to fulfill the right to health through the  
43 war, even while under attack. Those needs include: capacity building to respond to chemical  
44 attacks, including provision of correct antidotes, removing barriers to accessing professional  
45 training abroad, and research informed trainings to ensure the provision of appropriately  
46 equipped psychologists and mental health supporters to provide care to healthcare workers.  
47  
48  
49  
50  
51 Finally, future research should continue to evaluate the staggering challenges faced by Syria's  
52 health professionals, affording them the opportunity to share their experience and knowledge.  
53  
54  
55  
56  
57  
58  
59  
60



### Limitations

The findings are subject to a number of limitations. The majority of participants were in Gaziantep for SAMS trainings in October 2014, and therefore data are limited to the experiences of a sample of health workers, collected within a short five-day period. The potential for respondent bias is also acknowledged. Additionally, the situation in northwest Syria has changed and worsened since this data was collected. For this reason and to reflect more recent events the research team were able to include updated data from health workers currently working in Syria. Collectively these accounts provide an opportunity to learn more in-depth details of the experiences of health workers operating in the Syrian conflict, to understand challenges to health care provision, and to consider ways in which research can begin to support these providers.

### *Acknowledgements*

We would like to sincerely thank the dedicated health care workers in Syria for sharing their experiences for this research and to the Syrian American Medical Society for facilitating this research. The content is solely the responsibility of the authors and does not represent official views of the Foundation. The authors also thank Matthew Murray and Nicholas Degner for their contributions to the project.

### *Author's contributions*

KF and LR designed and conceptualized the study. LR, DR and ZS coordinated and carried out data collection. KF, EC and LR analyzed and interpreted the data and jointly contributed to writing the manuscript. All authors reviewed the final manuscript.

### *Competing Interest*

The authors declare the following competing competing interests. Dr. Rubenstein reports grants from MacArthur Foundation for the conduct of the study; grants from Oak Foundation, grants from JK Kellogg Foundation, grants from Polak-Mainz Stichting, outside the submitted work; and Chair, Safeguarding Health in Conflict Coalition.

### *Funding*

Funding for the study was provided by the MacArthur Foundation. The views and opinions expressed in this article are those of the authors and not necessarily those of the MacArthur Foundation who were not involved in any step in the design, collection, analysis, or writing of this manuscript.

### *BMJ Author License*

“I *Katherine Footer* The Corresponding Author of this article contained within the original manuscript which includes any diagrams & photographs within and any related or stand alone film submitted (the Contribution”) has the right to grant on behalf of all authors and does grant on behalf of all authors, a licence to the BMJ Publishing Group Ltd and its licencees, to permit this Contribution (if accepted) to be published in the BMJ and any other BMJ Group products and to exploit all subsidiary rights, as set out in our licence set out at: <http://www.bmj.com/about-bmj/resources-authors/forms-policies-and-checklists/copyright-open-access-and-permission-reuse>.”

### *Transparency declaration*

The lead author\* *Katherine Footer* affirms that this manuscript is an honest, accurate, and transparent account of the study being reported; that no important aspects of the study have been omitted; and that any discrepancies from the study as planned (and, if relevant, registered) have been explained.

*Data Sharing Statement:* All available data can be obtained from the corresponding author.

## References

1. Fouad FM, Sparrow A, Tarakji A, et al. Health workers and the weaponisation of health care in Syria: a preliminary inquiry for The Lancet-American University of Beirut Commission on Syria. *Lancet* 2017.
2. International Committee of the Red Cross. Ambulances and Pre-hospital services in Risk Situations. 2013. <https://www.icrc.org/eng/assets/files/publications/icrc-002-4104.pdf>
3. International Committee of the Red Cross. Ensuring the Preparedness and Security of Health Care Facilities in Armed Conflicts and Other Emergencies. 2015. <https://www.icrc.org/eng/assets/files/publications/icrc-002-4239.pdf>.
4. Physicians for Human Rights. Anatomy of Crisis: a map of attacks in health care in Syria. [https://s3.amazonaws.com/PHR\\_syria\\_map/web/index.html](https://s3.amazonaws.com/PHR_syria_map/web/index.html) (accessed 5 January 2016)
5. World Health Organization East Mediterranean Regional Office. Regional Situation Report, June 2014, 2014.
6. Syrian American Medical Society. A New Normal: Ongoing Chemical Weapons Attacks in Syria, 2016.
7. Human Rights Watch. Death by Chemicals: The Syrian Government's Widespread and Systematic Use of Chemical Weapons, 2017.
8. OHCHR. Chemical Weapons Attacks Documented by the UN Commission of Inquiry on the Syrian Arab Republic. 6 Sept 2017.
9. Coutts A, Fouad FM, Abbara A et al. Responding to the Syrian health crisis: the need for data and research. *The Lancet Respiratory medicine* 2015; **3**(3): e8-9.
10. Physicians for Human Rights. Doctors in the Crosshairs: Four Years of Attacks on Health Care in Syria, 2015.
11. Kherallah M, Alahfez T, Sahloul Z, et al. Health care in Syria before and during the crisis. *Avicenna Journal of Medicine* 2012; **2**(3): 51-3.
12. World Health Organization. Regional Situation Report, November 2015.
13. Aylward RB, Alwan A. Polio in Syria. *Lancet* 2014; **383**(9916): 489-91.
14. Cousins S. Syrian crisis: health experts say more can be done. *Lancet* 2015; **385**(9972): 931-4.
15. Devakumar D, Birch M, Rubenstein LS, et al. Child health in Syria: recognising the lasting effects of warfare on health. *Confl Health* 2015; **9**: 34.
16. Footer KH, Rubenstein L. A human rights approach to health care in conflict. *International Review of the Red Cross* 2013; **95**(889): 167-87.
17. UN Committee on Economic SaCRC. General Comment No. 14: The Right to the Highest Attainable Standard of Health (Art. 12 of the Covenant): UN Committee on Economic, Social and Cultural Rights (CESCR), 2000.
18. Fereday J, Muir-Cochrane E. Demonstrating Rigor Using Thematic Analysis: A Hybrid Approach of Inductive and Deductive Coding and Theme Development. *International Journal of Qualitative Methods* 2006; **5**(1): 80-92.
19. International Committee of the Red Cross. Health Care in Danger: The responsibilities of health-care personnel working in armed conflicts and other emergencies. Geneva: International Committee of the Red Cross; 2012.
20. United Nations General Assembly. Report of the Special Rapporteur on the right of everyone to the enjoyment of the highest attainable standard of physical and mental health.; 9 August 2013.

- 1
- 2
- 3
- 4 21. Footer KH, Meyer S, Sherman SG et al. On the frontline of eastern Burma's chronic
- 5 conflict--listening to the voices of local health workers. *Soc Sci Med* 2014; **120**: 378-86.
- 6 22. Monaghan C. Every Clinic is Now on the Frontline: The Impact on Children of Attacks
- 7 on Health Care in Afghanistan, 2016.
- 8 23. Save the Children. "Every Day Things are Getting Worse" The Impact on Children of
- 9 Attacks on Healthcare in Yemen: Watchlist on Children and Armed Conflict, 2017.
- 10 24. Physicians for Human Rights. Aleppo Abandoned: A Case Study on Health Care in
- 11 Syria, 2015.
- 12 25. UN Security Council. Resolution 2258. 2015.
- 13
- 14
- 15
- 16
- 17
- 18
- 19
- 20
- 21
- 22
- 23
- 24
- 25
- 26
- 27
- 28
- 29
- 30
- 31
- 32
- 33
- 34
- 35
- 36
- 37
- 38
- 39
- 40
- 41
- 42
- 43
- 44
- 45
- 46
- 47
- 48
- 49
- 50
- 51
- 52
- 53
- 54
- 55
- 56
- 57
- 58
- 59
- 60

## Standards for Reporting Qualitative Research (SRQR)\*

<http://www.equator-network.org/reporting-guidelines/srqr/>

Page/line no(s).

### Title and abstract

|                                                                                                                                                                                                                                                              |       |
|--------------------------------------------------------------------------------------------------------------------------------------------------------------------------------------------------------------------------------------------------------------|-------|
| <p><b>Title</b> - Concise description of the nature and topic of the study Identifying the study as qualitative or indicating the approach (e.g., ethnography, grounded theory) or data collection methods (e.g., interview, focus group) is recommended</p> | Pg. 1 |
| <p><b>Abstract</b> - Summary of key elements of the study using the abstract format of the intended publication; typically includes background, purpose, methods, results, and conclusions</p>                                                               | Pg. 6 |

### Introduction

|                                                                                                                                                                     |         |
|---------------------------------------------------------------------------------------------------------------------------------------------------------------------|---------|
| <p><b>Problem formulation</b> - Description and significance of the problem/phenomenon studied; review of relevant theory and empirical work; problem statement</p> | Pg. 7-8 |
| <p><b>Purpose or research question</b> - Purpose of the study and specific objectives or questions</p>                                                              | Pg. 4   |

### Methods

|                                                                                                                                                                                                                                                                                                                                                                                                             |         |
|-------------------------------------------------------------------------------------------------------------------------------------------------------------------------------------------------------------------------------------------------------------------------------------------------------------------------------------------------------------------------------------------------------------|---------|
| <p><b>Qualitative approach and research paradigm</b> - Qualitative approach (e.g., ethnography, grounded theory, case study, phenomenology, narrative research) and guiding theory if appropriate; identifying the research paradigm (e.g., postpositivist, constructivist/ interpretivist) is also recommended; rationale**</p>                                                                            | Pg. 4   |
| <p><b>Researcher characteristics and reflexivity</b> - Researchers' characteristics that may influence the research, including personal attributes, qualifications/experience, relationship with participants, assumptions, and/or presuppositions; potential or actual interaction between researchers' characteristics and the research questions, approach, methods, results, and/or transferability</p> | Pg. 3-4 |
| <p><b>Context</b> - Setting/site and salient contextual factors; rationale**</p>                                                                                                                                                                                                                                                                                                                            | Pg. 3   |
| <p><b>Sampling strategy</b> - How and why research participants, documents, or events were selected; criteria for deciding when no further sampling was necessary (e.g., sampling saturation); rationale**</p>                                                                                                                                                                                              | Pg. 3-4 |
| <p><b>Ethical issues pertaining to human subjects</b> - Documentation of approval by an appropriate ethics review board and participant consent, or explanation for lack thereof; other confidentiality and data security issues</p>                                                                                                                                                                        | Pg. 4-5 |
| <p><b>Data collection methods</b> - Types of data collected; details of data collection procedures including (as appropriate) start and stop dates of data collection and analysis, iterative process, triangulation of sources/methods, and modification of procedures in response to evolving study findings; rationale**</p>                                                                             | Pg. 4   |

|                       |                                                                                                                                                                                                                                                       |       |
|-----------------------|-------------------------------------------------------------------------------------------------------------------------------------------------------------------------------------------------------------------------------------------------------|-------|
| 1<br>2<br>3<br>4<br>5 | <b>Data collection instruments and technologies</b> - Description of instruments (e.g., interview guides, questionnaires) and devices (e.g., audio recorders) used for data collection; if/how the instrument(s) changed over the course of the study | Pg. 4 |
| 6<br>7<br>8           | <b>Units of study</b> - Number and relevant characteristics of participants, documents, or events included in the study; level of participation (could be reported in results)                                                                        | Pg. 5 |
| 9<br>10<br>11<br>12   | <b>Data processing</b> - Methods for processing data prior to and during analysis, including transcription, data entry, data management and security, verification of data integrity, data coding, and anonymization/de-identification of excerpts    | Pg. 4 |
| 13<br>14<br>15<br>16  | <b>Data analysis</b> - Process by which inferences, themes, etc., were identified and developed, including the researchers involved in data analysis; usually references a specific paradigm or approach; rationale**                                 | Pg. 4 |
| 17<br>18<br>19<br>20  | <b>Techniques to enhance trustworthiness</b> - Techniques to enhance trustworthiness and credibility of data analysis (e.g., member checking, audit trail, triangulation); rationale**                                                                | Pg. 4 |

## Results/findings

|                      |                                                                                                                                                                                                   |           |
|----------------------|---------------------------------------------------------------------------------------------------------------------------------------------------------------------------------------------------|-----------|
| 23<br>24<br>25<br>26 | <b>Synthesis and interpretation</b> - Main findings (e.g., interpretations, inferences, and themes); might include development of a theory or model, or integration with prior research or theory | Pg. 16-18 |
| 27<br>28<br>29       | <b>Links to empirical data</b> - Evidence (e.g., quotes, field notes, text excerpts, photographs) to substantiate analytic findings                                                               | N/A       |

## Discussion

|                                  |                                                                                                                                                                                                                                                                                                                                                                                                             |           |
|----------------------------------|-------------------------------------------------------------------------------------------------------------------------------------------------------------------------------------------------------------------------------------------------------------------------------------------------------------------------------------------------------------------------------------------------------------|-----------|
| 32<br>33<br>34<br>35<br>36<br>37 | <b>Integration with prior work, implications, transferability, and contribution(s) to the field</b> - Short summary of main findings; explanation of how findings and conclusions connect to, support, elaborate on, or challenge conclusions of earlier scholarship; discussion of scope of application/generalizability; identification of unique contribution(s) to scholarship in a discipline or field | Pg. 17-18 |
| 38<br>39                         | <b>Limitations</b> - Trustworthiness and limitations of findings                                                                                                                                                                                                                                                                                                                                            | Pg. 16-17 |

## Other

|                |                                                                                                                                               |        |
|----------------|-----------------------------------------------------------------------------------------------------------------------------------------------|--------|
| 42<br>43<br>44 | <b>Conflicts of interest</b> - Potential sources of influence or perceived influence on study conduct and conclusions; how these were managed | Pg. 19 |
| 45<br>46       | <b>Funding</b> - Sources of funding and other support; role of funders in data collection, interpretation, and reporting                      | Pg.19  |

\*The authors created the SRQR by searching the literature to identify guidelines, reporting standards, and critical appraisal criteria for qualitative research; reviewing the reference lists of retrieved sources; and contacting experts to gain feedback. The SRQR aims to improve the transparency of all aspects of qualitative research by providing clear standards for reporting qualitative research.

1  
2  
3  
4  
5  
6  
7  
8  
9  
10  
11  
12  
13  
14  
15  
16  
17  
18  
19  
20  
21  
22  
23  
24  
25  
26  
27  
28  
29  
30  
31  
32  
33  
34  
35  
36  
37  
38  
39  
40  
41  
42  
43  
44  
45  
46  
47  
48  
49  
50  
51  
52  
53  
54  
55  
56  
57  
58  
59  
60

\*\*The rationale should briefly discuss the justification for choosing that theory, approach, method, or technique rather than other options available, the assumptions and limitations implicit in those choices, and how those choices influence study conclusions and transferability. As appropriate, the rationale for several items might be discussed together.

**Reference:**

O'Brien BC, Harris IB, Beckman TJ, Reed DA, Cook DA. **Standards for reporting qualitative research: a synthesis of recommendations.** *Academic Medicine*, Vol. 89, No. 9 / Sept 2014  
DOI: 10.1097/ACM.0000000000000388

For peer review only

# BMJ Open

## Qualitative accounts from Syrian health professionals regarding violations of the right to health, including the use of chemical weapons, in opposition-held Syria

|                                    |                                                                                                                                                                                                                                                                                                                                                                                   |
|------------------------------------|-----------------------------------------------------------------------------------------------------------------------------------------------------------------------------------------------------------------------------------------------------------------------------------------------------------------------------------------------------------------------------------|
| Journal:                           | <i>BMJ Open</i>                                                                                                                                                                                                                                                                                                                                                                   |
| Manuscript ID                      | bmjopen-2017-021096.R1                                                                                                                                                                                                                                                                                                                                                            |
| Article Type:                      | Research                                                                                                                                                                                                                                                                                                                                                                          |
| Date Submitted by the Author:      | 27-Apr-2018                                                                                                                                                                                                                                                                                                                                                                       |
| Complete List of Authors:          | Footer, Katherine; Johns Hopkins University Bloomberg School of Public Health,<br>Clouse, Emily; Johns Hopkins University Bloomberg School of Public Health<br>Raya, Diana; Syrian Medical Association<br>Zaher Sahloul, Mohammed; University of Illinois at Chicago College of<br>Medicine<br>Rubenstein, Leonard; Johns Hopkins University Bloomberg School of Public<br>Health |
| <b>Primary Subject<br>Heading</b>: | Global health                                                                                                                                                                                                                                                                                                                                                                     |
| Secondary Subject Heading:         | Qualitative research                                                                                                                                                                                                                                                                                                                                                              |
| Keywords:                          | Health workers, Right to Health, Syria, Conflict                                                                                                                                                                                                                                                                                                                                  |
|                                    |                                                                                                                                                                                                                                                                                                                                                                                   |

SCHOLARONE™  
Manuscripts



1  
2  
3  
4  
5 **Title: Qualitative accounts from Syrian health professionals regarding violations of the**  
6 **right to health, including the use of chemical weapons, in opposition-held Syria**  
7  
8  
9

10 **A. Author and co-author names**

11 Katherine H.A. Footer <sup>1,2,3\*</sup>§ Emily Clouse <sup>1\*</sup> Diana Rayes <sup>2,3</sup> Zaher Sahloul<sup>4</sup> Leonard  
12 Rubenstein <sup>2,3</sup>  
13

14  
15 (1) Department of Health Behavior and Society, Johns Hopkins Bloomberg School of Public  
16 Health, Baltimore, MD, U.S.A.

17  
18 (2) Department of Epidemiology, Johns Hopkins Bloomberg School of Public Health, Baltimore,  
19 MD, U.S.A.

20  
21 (3) Center for Public Health and Human Rights, Johns Hopkins Bloomberg School of Public  
22 Health, Baltimore, MD, U.S.A.

23  
24 (4) The Syrian American Medical Society, Washington D.C., U.S.A.

25  
26 \* To denote joint first authorship

27  
28 § Corresponding Author  
29  
30  
31

32 **B. Corresponding Author**

33 Katherine H. A. Footer

34 Assistant Scientist

35 Department of Epidemiology &

36 Department of Health Behavior and Society

37 Johns Hopkins Bloomberg School of Public Health

38 615 N. Wolfe St. and 624 N Broadway St.

39 Baltimore, MD 21205

40 [kfooter1@jhu.edu](mailto:kfooter1@jhu.edu), 442-287-8777  
41  
42  
43  
44  
45  
46  
47  
48  
49

50 **C. Full names, institutions, city and country of co-authors**

51 Emily Clouse, MSc-PH

52 Research Program Manager

53 Department of Health Behavior and Society  
54  
55  
56  
57  
58  
59  
60

1  
2  
3 Johns Hopkins School of Public Health

4  
5 Baltimore, MD, 21205

6  
7 [eclouse@jhu.edu](mailto:eclouse@jhu.edu)

8  
9  
10 Diana Rayes, MHS

11 Project Coordinator, Ethical Challenges in Humanitarian Health Contexts of Extreme Violence

12  
13 Syrian American Medical Society

14  
15 Gaziantep, Turkey

16  
17 [diana.rayes7@gmail.com](mailto:diana.rayes7@gmail.com)

18  
19  
20 Mohammed Zaher Sahloul, M.D.

21 Associate Clinical Professor

22  
23 College of Medicine

24  
25 University of Illinois

26  
27 Chicago IL, USA

28  
29 [Sahloul@medglobal.org](mailto:Sahloul@medglobal.org)

30  
31  
32 Leonard Rubenstein, LLM

33  
34 Senior Scientist

35  
36 Department of Epidemiology

37  
38 Johns Hopkins School of Public Health,

39  
40 Baltimore, MD, 21205

41  
42 [lrubenstein@jhu.edu](mailto:lrubenstein@jhu.edu)

43  
44 **D. Key words for indexing**

45  
46 right to health; conflict, health workers, Syria

47  
48  
49 **E. Word Count** (excluding title page, abstract, references and tables)

50  
51 4,109

## 1 **Abstract**

2 Objectives: To explore the impact of the conflict, including the use of chemical weapons, in  
3 Syria on health care through the experiences of health providers using a public health and human  
4 rights lens.

5  
6 Design: A qualitative study using semi-structured interviews conducted in-person or over Skype  
7 using a thematic analysis approach.

8  
9 Setting: Interviews were conducted with Syrian health workers operating in opposition-held  
10 Syria in cooperation with a medical relief organization in Gaziantep, Turkey.

11  
12 Participants: We examined data from 29 semi-structured in-depth interviews with a sample of  
13 health professionals with current or recent work-related experience in opposition-controlled areas  
14 of Syria, including respondents to chemical attacks.

15  
16 Results: Findings highlight the health worker experience of attacks on health infrastructure and  
17 services in Syria and consequences in terms of access and scarcity in availability of essential  
18 medicines and equipment. Quality of services is explored through physicians' accounts of the  
19 knock-on effect of shortages of equipment, supplies, and personnel on the right to health and its  
20 ethical implications. Health workers themselves were found to be operating under extreme  
21 conditions, in particular responding to the most recent chemical attacks that occurred in 2017,  
22 with implications for their own health and mental wellbeing.

23  
24 Conclusions: The study provides unique insight into the impact war has had on Syrian's right to  
25 health through the accounts of a sample of Syrian health professionals, with continuing relevance  
26 to the current conflict and professional issues facing health workers in conflict settings.

## 27 28 **Strengths and Limitations of the Study**

- 29
- 30 ● This study uniquely explores the experiences of health care providers providing health care during the current conflict in Syria.

- 1  
2  
3 31 ● The study revealed the ways in which the conflict has impacted health providers' ability to  
4 32 provide health care in accordance with patients' right health.  
5  
6 33 ● The findings have implications for capacity-building within humanitarian organizations to  
7 34 counter the challenges faced by Syria's health professionals.  
8  
9 35 ● Interviews were limited to the experiences of a small sample of health workers working in  
10 36 opposition-held regions of Syria, including survivors of chemical attacks.  
11  
12  
13 37  
14  
15  
16  
17  
18  
19  
20  
21  
22  
23  
24  
25  
26  
27  
28  
29  
30  
31  
32  
33  
34  
35  
36  
37  
38  
39  
40  
41  
42  
43  
44  
45  
46  
47  
48  
49  
50  
51  
52  
53  
54  
55  
56  
57  
58  
59  
60
- The study revealed the ways in which the conflict has impacted health providers' ability to provide health care in accordance with patients' right health.
  - The findings have implications for capacity-building within humanitarian organizations to counter the challenges faced by Syria's health professionals.
  - Interviews were limited to the experiences of a small sample of health workers working in opposition-held regions of Syria, including survivors of chemical attacks.

## 1. Background

The ongoing civil war in Syria has created one of the direst humanitarian crises of our time.<sup>1,2</sup> Syria's health care system has been decimated and the healthcare community targeted as part of an ongoing military strategy by the Syrian government, now supported by Russian air power.<sup>2</sup> Initiatives exist to assist health providers operating in insecure environments,<sup>3,4</sup> including intense advocacy against increasing attacks on healthcare in conflict settings. However, only a small body of research studies<sup>5</sup> have unpacked the operational, professional, and personal challenges health providers face, and none in Syria. In light of the recent allegations of chemical weapon use throughout Syria and the intimidation of medics speaking out by the Syrian government, the perspectives of healthcare workers could not be more pressing.<sup>6,7</sup>

Human rights organizations and UN agencies have placed a spotlight on the Syrian government's assault on health care.<sup>6,8-14</sup> Physicians for Human Rights documented 478 attacks on medical facilities and the killing of 830 medical personnel since the start of the conflict in 2011, the vast majority by the Syrian government and allied forces.<sup>8</sup> Through to December 2017 Syria has experienced 492 separate attacks on health facilities,<sup>15</sup> while at the commencement of this research in 2014, 58% of hospitals throughout Syria were either not functioning or were restricted in their ability to provide services.<sup>16</sup> This number reflects healthcare facilities in the Aleppo, rural Damascus, Homs, Dara'a, and Deir-el Zor governorates. The World Health Organization has reported severe shortages of medical supplies, scattered vaccination coverage, lack of capacity to address severe health needs and a critical shortage of health providers in Syria.<sup>15</sup> In addition, medical providers have had to respond to the unprecedented use of toxic chemical agents used against civilians since the commencement of the war in December 2012, including a UN-confirmed sarin gas attack in April 2017 in Syria's northern Idlib province<sup>17</sup> as well as persistent allegations of chlorine gas and sarine-use in Eastern Ghouta,<sup>18,19</sup> Syria throughout 2017 and 2018.<sup>17,20,21</sup>

In Syria the health care context is currently made up of three separate health 'systems': the first is run by the Syrian government and is restricted to areas it controls; a second system is comprised of an ad hoc collection of local and international non-governmental organisations (NGOs), local committees, and relief agencies operating primarily within opposition-controlled areas; and a third system is maintained by the Islamic State (ISIS) in areas it controls.<sup>22</sup> One of

1  
2  
3 69 these organizations is the diaspora Syrian American Medical Society (SAMS),<sup>23</sup> a consortium of  
4 70 Syrian-American health professionals founded in 1998 as a professional society for networking  
5 71 for physicians of Syrian descent. In 2011, SAMS extended its capacity as a non-profit  
6 72 organisation in response to the Syrian crisis to provide support to healthcare staff and facilities,  
7 73 including providing aid and medical resources in hard-to-reach areas throughout Syria as well as  
8 74 ongoing training for healthcare professionals throughout the conflict. SAMS' operations are  
9 75 mainly in non-government controlled areas, including besieged areas, in northern and southern  
10 76 Syria.

11 77 Health care workers operating within opposition-controlled areas have struggled to  
12 78 provide services in the midst of a multi-dimensional crisis.<sup>24</sup> A protracted war on healthcare  
13 79 infrastructure has led to inadequate access to basic necessities and a unprecedented humanitarian  
14 80 crisis.<sup>25-29</sup> It is in this setting that health providers must make daily decisions at the micro, meso,  
15 81 and macro-level of healthcare provision (e.g., who receives care, which hospital to repair, where  
16 82 to target supplies). Conversely, in government controlled areas the health care system has a  
17 83 premium on servicing its forces, with few health resources available for the civilian population,  
18 84 and coerced medical staff to remain and treat them.<sup>30</sup>

19 85 Obligations under international humanitarian law include requirements not to attack or  
20 86 interfere with health care services.<sup>31</sup> According to the Geneva Conventions, parties to a conflict  
21 87 are obligated to “respect and protect” wounded and sick people as well as medical facilities,  
22 88 personnel and transports. They must not directly attack them and are required to take steps to  
23 89 ensure that combat operations distinguish between military and civilian objects.<sup>32-34</sup> Further,  
24 90 health professionals may neither be punished for engaging in actions incompatible with medical  
25 91 ethics, nor compelled to do so.<sup>34</sup> The bombing and use of chemical weapons against hospitals,  
26 92 use of missiles and sniper attacks on ambulances, and arrest and torture of health workers for  
27 93 impartial care, all violate these obligations and constitute war crimes.<sup>30</sup>

28 94 Human rights obligations can be applied to health systems, including those in conflict, as  
29 95 an analytical tool to help better articulate and understand the responsibilities of states to respect –  
30 96 to refrain from directly interfering with a right; to protect – to prevent third-party interference  
31 97 with the enjoyment of a right; and to fulfil – to take steps to ensure the fullest possible realisation  
32 98 of a right.<sup>31</sup> The right to health, as defined by Article 12 of the International Covenant of  
33 99 Economic, Social and Cultural Rights (ICESCR) and further articulated by UN Committee on  
34  
35  
36  
37  
38  
39  
40  
41  
42  
43  
44  
45  
46  
47  
48  
49  
50  
51  
52  
53  
54  
55  
56  
57  
58  
59  
60

1  
2  
3 100 Economic, Social and Cultural Rights in its General Comment 14, presses upon states the  
4 101 obligations under the right to ensure the availability, accessibility, acceptability and quality of  
5 102 health facilities, goods and services.<sup>35</sup> This study explores the complex challenges health workers  
6  
7 103 face in providing care when health care services and personnel are themselves subjected to  
8  
9 104 violence and forced to operate in the midst of ongoing human rights violations and war crimes.  
10  
11  
12 105

## 13 106 **2. Methods**

15 107 Qualitative research was conducted in October 2014 in Gaziantep with Syrian health  
16  
17 108 workers attending a SAMS training in Turkey and on a separate occasion in July-August 2017  
18  
19 109 using secure online communication application with health care providers working in areas  
20  
21 110 throughout Syria outside of government control. The study sought to: 1) describe attacks and  
22  
23 111 interferences with healthcare occurring in opposition-controlled areas of Syria; and 2) explore  
24  
25 112 the challenges health workers face and the consequences for civilians' right to health and 3) to  
26  
27 113 include the particular challenges faced by health workers who have responded to chemical  
28  
29 114 attacks in northern Syria.

### 30 115 31 116 2.1. Setting

32 117 The majority of the qualitative fieldwork was collected in Gaziantep, Turkey, a city 97  
33  
34 118 kilometers north of Aleppo, Syria, Gaziantep is host to Syrian and international NGOs, and is a  
35  
36 119 humanitarian hub for cross-border support. Among the Syrian NGOs operating out of Gaziantep  
37  
38 120 is the Syrian American Medical Society (SAMS), who partnered with the Johns Hopkins  
39  
40 121 Bloomberg School of Public Health (JHSPH) on this project. SAMS provides routine medical  
41  
42 122 trainings in Gaziantep for health professionals operating inside Syria, providing researchers the  
43  
44 123 unique opportunity to speak directly to field staff with cross-border access.<sup>36</sup> While the majority  
45  
46 124 of the data was collected in-person in Gaziantep during the medical training in 2014 (N=24),  
47  
48 125 separate interviews (N=5) were conducted with different sample of health professionals inside  
49  
50 126 Syria via Wire, a secure online communication tool similar to Skype, in 2017 to understand the  
51  
52 127 effect of the continuing violence inside Syria on healthcare; namely, the chemical attacks that  
53  
54 128 occurred in early April of 2017 in Khan Sheikhoun, a province of Idlib in northwestern Syria.

55 129

### 56 130 2.2. Study Population

1  
2  
3 131 All participants were identified through purposive sampling methods, taking account of  
4  
5 132 key informants' specialized knowledge and unique perspectives. Eligibility criteria required  
6  
7 133 participants to be aged 18 years or older and a qualified health professional (formally-trained  
8  
9 134 doctors, nurses, dentists, and laboratory, anesthesiology and surgery technicians) with current or  
10  
11 135 recent work-related experience in opposition-controlled areas of Syria. Participants were told the  
12  
13 136 purpose of the study and how the information provided would be used and that participation was  
14  
15 137 voluntary. Permission was sought and in all but one case granted for audio recording; no names  
16  
17 138 or other identifiers were collected. With the exception of respondents who were fluent in  
18  
19 139 English, interviews were conducted in Arabic either through an Arabic translator or Arabic-  
20  
21 140 speaking interviewer. The 2014 interviewer (LR) concluded with a final sample of 27 when no  
22  
23 141 new themes emerged. Three of the interviews conducted were excluded from this analysis due to  
24  
25 142 poor audio quality, incomplete interview, or declining audio recording. The respondents included  
26  
27 143 18 physicians (14 surgeons, one cardiologist, two anesthesiologists, and one pediatrician), three  
28  
29 144 nurses, three dentists, and the remaining three were laboratory, anesthesiology, and surgery  
30  
31 145 technicians. An additional 5 interviews with new participants were conducted in 2017 by an  
32  
33 146 Arabic speaking interviewer (DR) to address experiences of medical staff (two surgeons, one  
34  
35 147 pharmacist, one anesthesiology technician, and one nurse) inside Syria following a major  
36  
37 148 chemical attack in northwestern Syria. Audio-recordings were transcribed verbatim and  
38  
39 149 triangulated with additional notes.  
40  
41 150

### 42 151 2.3. Measurement and Analysis

43 152 Interviews followed a semi-structured interview guide that was developed in accordance  
44  
45 153 with the aims of this study. This analysis reviews the challenges health care providers face and  
46  
47 154 the constraints on patient care when approached through a right to health lens with a focus on:  
48  
49 155 *Availability*, understood as a functioning public health and health care facilities, goods, and  
50  
51 156 services, to include adequate hospitals and clinics, trained health care professionals, and essential  
52  
53 157 medicines; *Accessibility*, the requirement that health facilities, goods, and services be within safe  
54  
55 158 physical reach for all sections of the population; and *Quality*, the entitlement that health  
56  
57 159 facilities, goods, and services must also be scientifically appropriate and of good quality, to  
58  
59 160 include skilled medical personnel, scientifically approved and unexpired drugs and hospital  
60  
161 equipment.<sup>35</sup>



1  
2  
3 162 Two independent reviewers (EC, KF) conducted the coding and analysis using an  
4  
5 163 inductive and deductive approach to coding that relied on a priori topics, while still allowing for  
6  
7 164 the emergence of new themes through a process of thematic analysis.<sup>18</sup> First, researchers read  
8  
9 165 through the transcripts to familiarize themselves with the data, three transcripts were then open-  
10  
11 166 coded to delineate established and emergent categories. Coding categories were based on a priori  
12  
13 167 topics around the right to health, and new concepts that emerged from the data. The researchers  
14  
15 168 compared coded transcripts to identify discrepancies and further define the coding scheme. The  
16  
17 169 codes were reviewed by KF, EC, and LR. Clean transcripts were imported into Hyperresearch  
18  
19 170 3.7.2 and coded using the final scheme developed by the analysts.  
20  
21 171

22 172 2.4. Ethical Approval  
23  
24 173 The JHSPH Institutional Review Board and a local review board approved research protocols for  
25  
26 174 the 2014 and 2017 interviews. Study participants provided informed consent to be interviewed.  
27  
28 175 All participants in accordance with IRB procedures were explained the purpose of the research,  
29  
30 176 were free to decline to participate, and told of their liberty to withhold information they were  
31  
32 177 uncomfortable to give. Finally, we assured and accorded them privacy, anonymity, and  
33  
34 178 confidentiality.  
35  
36 179

37 180 2.5 Patient and Public Involvement  
38  
39 181 No Patients or members of the public were involved in the conduct of this research.  
40  
41 182

42 183 **3. Results**  
43  
44 184 Findings from this study highlight major gaps in the availability, accessibility and quality of care  
45  
46 185 available in large areas of Syria most effected and besieged by the ongoing conflict. An emergent  
47  
48 186 theme related and connected to quality of care was the presence of acute mental health stressors  
49  
50 187 and demoralizing working conditions impacting on the well-being of health providers in this  
51  
52 188 setting. Despite this, results point to key ways in which health providers on the ground have  
53  
54 189 taken steps to fill these gaps so that civilians can continue to receive life-saving care.  
55  
56 190

57 191 3.1. Sample characteristics  
58  
59  
60

1  
2  
3 192 Of the 29 participants in this sample, all but two were Syrian male health professionals. This is  
4  
5 193 mainly due to the lack of female health professionals at the medical training in 2014, and the lack  
6  
7 194 of female participants volunteering information for the 2017 interviews. The non-Syrian health  
8  
9 195 professionals were female Americans who had recently worked in Syria, and were interviewed in  
10  
11 196 2014. The respondents had varied experience levels and medical professional backgrounds and  
12  
13 197 had experience working in occupation-controlled areas of northwest Syria (exact governorates  
14  
15 198 excluded). (Table 1) Below we present key findings emerging from our analysis of accounts of  
16  
17 199 medical professionals in Syria.  
18

19 201 Table 1 – Participant Demographics

|                           |    |
|---------------------------|----|
| <i>Total Participants</i> | 29 |
| <i>Gender</i>             |    |
| Male                      | 27 |
| Female                    | 2  |
| <i>Nationality</i>        |    |
| Syrian                    | 27 |
| American                  | 2  |
| <i>Profession</i>         |    |
| Surgeon                   | 13 |
| Cardiologist              | 1  |
| Anesthesiologist          | 2  |
| Pediatrician              | 1  |
| Nurse                     | 4  |
| Dentist                   | 2  |
| Technician                | 4  |
| Health Co-ordinators      | 2  |

20  
21  
22  
23  
24  
25  
26  
27  
28  
29  
30  
31  
32  
33  
34  
35  
36  
37  
38  
39  
40  
41 202

42 203

### 43 204 3.2. Availability

44  
45 205 The targeting of hospitals and ambulances in opposition-controlled and besieged areas has  
46  
47 206 dramatically decreased the availability of health care. Participant descriptions capture both  
48  
49 207 indiscriminate and targeted attacks, including the use of mortar shells, TNT barrel bombs and  
50  
51 208 nerve agents, often with multiple attacks on the same facility. A participant described constant  
52  
53 209 bombardment of a hospital in Latakia:

54 210 “Interviewer: How many times has the hospital been hit in three months?”  
55  
56  
57  
58  
59  
60

1  
2  
3 211 *Respondent: Almost 90 times. It's on a daily basis.... The furthest time was 100 meters.*  
4 212 *Sometimes it's 10 meters, 15 meters away from the hospital.” (Interview 8, 2014)*

5 213  
6  
7 214 Health care workers have responded to the constant attacks and attempts to obliterate healthcare  
8  
9 215 availability by developing methods to protect themselves, their patients, and their equipment. In  
10  
11 216 response, nearly all participants described a common strategy of placing hospitals underground.  
12  
13 217 However, doctors explained that even fortified hospitals underground or in a cave are vulnerable,  
14  
15 218 in particular if exposed to a chemical attack, especially to heavy sarin gas:

16 219 *“We operate in a fortified hospitals underground, but with chemical attacks all hospital are*  
17 220 *susceptible to the chemical attacks and getting destroyed.” (Interview 1, 2017)*

18 221  
19  
20 222 The ongoing conflict has restricted movement and limited the availability of health supplies.  
21  
22 223 Medicines and equipment for trauma cases, the management of chronic diseases, and treatable  
23  
24 224 childhood diseases were highlighted as being in short supply:

25 225 *“Because there are no vaccinations we now see polio and measles. All these diseases are*  
26 226 *different, some diseases need specific medication, and we haven't any.” (Interview 12, 2014)*

27 227  
28 228 In particular participants describing the medical response to the 2017 chemical attacks,  
29  
30 229 highlighted that hospitals lacked sufficient supplies of appropriate antidotes to treat the nerve  
31  
32 230 agent(s) civilians were exposed to:

33 231 *“Our hospital wasn't equipped to treat chemical attacks, since we thought that chemical*  
34 232 *weapons were eradicated since 2013. Back then we brought big amount of Atropine to treat*  
35 233 *chemical attack victims but the medication expired and we never used it.” (Interview 1, 2017)*

36 234  
37  
38  
39 235 The provision of medical supplies and medications, including protective equipment for chemical  
40  
41 236 attacks, improved by 2017 through the work of humanitarian organisations. However, all  
42  
43 237 participants described the continued scarcity of life-saving protective equipment and inadequate  
44  
45 238 availability of specialist care. Given the high volume of serious traumatic injuries, availability of  
46  
47 239 essential equipment and qualified physicians is essential to protect the right to health of those  
48  
49 240 injured by conflict. However, in the absence of resources and training participant accounts  
50  
51 241 highlighted altered standards of care implemented to preserve life:

51 242 *“Lack of surgeons caused many cases to either be amputated after treatment, resulting in death*  
52 243 *or complications. A lack of instruments for orthopedic and neurosurgery have also caused many*  
53 244 *complications. Despite this difficult reality, we are still doing 4,500 surgeries each month.”*  
54 245 *(Interview 2, 2014)*

55 246  
56  
57  
58  
59  
60

1  
2  
3 247 With respect to the chemical attacks, healthcare workers were also placed at increased risk of  
4  
5 248 harm due to the lack of availability of appropriate safety equipment when treating patients  
6  
7 249 exposed to chemical agents:

8 250 *“Honestly, we still haven’t received fully protective equipment. When the medical staff were*  
9 251 *affected and we saw how people were getting affected even when they thought they were*  
10 252 *protected ... this is when we started using masks. But even masks weren’t good enough...”*  
11 253 (Interview 2, 2017)  
12 254

### 14 255 3.3. Accessibility

15 256 Attacks on hospitals during the 2017 sarin attacks limited patient access to hospitals at precisely  
16 257 the moment that it was most critical:

17 258 *“We witnessed the aircraft striking the city 6 times, firing exactly 11 missiles. Once the aircraft*  
18 259 *were gone, we went to the hospital and we saw that the air strikes were targeting the hospital*  
19 260 *where the chemical attack victims were transferred to get treatment. By the time we arrived at*  
20 261 *the hospital, we found that all the staff had fled from fear, and a big part of the hospital was*  
21 262 *destroyed. One patient was undergoing a surgery, his blood was still on the operating table.”*  
22 263 (Interview 3, 2017)  
23 264

24 265 Even in cases where hospitals are not completely destroyed the impact of bombardments on  
25 266 health care access is profound, with many participants describing regular interruptions and  
26 267 closures. Fear of attacks on hospitals has an indirect but major impact on patient access to health  
27 268 services. As a participant explained:

28 269 *“Lots of people don't dare to go to the hospital, because they know that the hospital has been*  
29 270 *targeted by the bombardment – five, six times. It's only those who are in grave need who will go*  
30 271 *to the hospital.”* (Interview 11, 2014)  
31 272

32 273 For civilians who have been injured in attacks or who are unable to travel to a hospital for other  
33 274 reasons, medical care access is dependent on first responders or civilian transportation. However,  
34 275 ambulances are in short supply, in part due attacks on them, and the risk to first responders is  
35 276 great, as they are easy targets for aerial attacks:

36 277 *“There were many cases when ambulance drivers have been attacked, especially at night in the*  
37 278 *dark. The aircraft see the lights of the ambulance and attack it.”* (Interview 2, 2014)  
38 279

39 280 At times of acute crisis, such as the recent chemical attacks, lack of prompt access to facilities  
40 281 owing to long transport times and restricted capacity, has meant many additional civilian  
41 282 fatalities:  
42  
43  
44  
45  
46  
47  
48  
49  
50  
51  
52  
53  
54  
55  
56  
57  
58  
59  
60

1  
2  
3 283 *“There is no clear strategy for the health system tactically or operationally to deal with the*  
4 284 *number of injuries, and nerve injuries are a new topic for us. If there had been a medical point*  
5 285 *nearby, maybe one or two kilometers away from our hospital, we would have saved a lot of*  
6 286 *people.”* (Interview 5, 2017)  
7 287

8 288 Finally, the difficulties and dangers of transporting supplies and equipment into besieged areas  
9 289 was highlighted as another access issue that poses severe risks for health workers. One  
10 290 participant reported that 28 staff from their hospital had been arrested while attempting to carry  
11 291 medicines and supplies to their hospital:

12 292 *“Taking medicine into [town name], is a crime that is punished...they go to prison and nobody*  
13 293 *knows after that, of course it’s torture.”* (Interview 7, 2014)  
14 294

### 15 295 3. 4. Quality

16 296 Makeshift hospitals (known as field hospitals) emerged in opposition-controlled areas as a result  
17 297 of the assault on health infrastructure in rebel held areas of Syria, replacing hospitals and clinics  
18 298 formerly serving Syria’s population. These field hospitals are located in former factories, farms,  
19 299 and schools. Although Syrian health workers and their supporters provide supplies and  
20 300 equipment to these field hospitals, in many of them it is extremely difficult to maintain standards  
21 301 of care, especially at times of mass casualties from attacks, as evidenced in participant  
22 302 descriptions:

23 303 *“Everything is allowed in a field hospital. You can put the intravenous line in with alcohol - we*  
24 304 *do it all the time. You can do operations without sterilized matters, without anaesthesia*  
25 305 *machines.”* (Interview 15, 2014)  
26 306

27 307 During the 2017 chemical attacks, some hospitals that had been closed-down for safety reasons  
28 308 were reopened to deal with the overwhelming number of casualties:

29 309 *Most of the hospital was destroyed by an attack on [date excluded] and it was out of service, but*  
30 310 *because the other hospital couldn’t deal with the large number of patient, they reactivated the*  
31 311 *emergency department. Even though it was very risky, just so they could receive some patients.*  
32 312 (Interview 3, 2017)  
33 313

34 314 Participants also reported that because of the high number of trauma cases, patients with other  
35 315 medical conditions were often left untreated. During the chemical attacks, triage decisions led to  
36 316 a lack of attention to the most vulnerable, including large numbers of affected children.

37 317 Participants’ accounts highlight that medical personnel such as dentists and anesthesiology  
38 318 technicians are acquiring new skills to meet the chronic shortage of surgeons and  
39  
40  
41  
42  
43  
44  
45  
46  
47  
48  
49  
50  
51  
52  
53  
54  
55  
56  
57  
58  
59  
60

1  
2  
3 319 anesthesiologists, because so many health workers have fled Syria. Here a participant describes  
4  
5 320 how they performed a surgery without previous training:

6  
7 321 *[Interviewer: Part of your training was in that kind of surgery?]* “No, it was just a minimal part  
8 322 *of it, I was given just an overview of these types of surgeries, but out of necessity I’ve had to do*  
9 323 *these surgeries.”* (Interview 1, 2014)  
10 324

11  
12 325 Participants involved in treating patients in the most recent chemical attacks were frank in  
13  
14 326 describing how ill prepared the medical sector has been, with training and equipment inadequate  
15 327 to meet the demands of the overwhelming crisis. This resulted in a highly variable quality of care  
16  
17 328 at medical facilities:

18  
19 329 *I think that medical providers barely saved 1-2% of the chemical attack victims, because the*  
20 330 *situation is totally different. We have no prior training, medical staff or equipment to deal with*  
21 331 *it. I believe that what we were able to provide was too little.* (Interview 1, 2017)  
22 332

23  
24 333 The continued outward migration of healthcare providers from Syria, and resulting shortage in  
25  
26 334 quality clinical care has also been exacerbated by the relentless targeting of healthcare services  
27 335 and recent chemical attacks:

28  
29 336 *“Some healthcare providers decided to stay in Turkey and not to go back to Syria until things*  
30 337 *are clearer, others said that the use of chemical weapons is something that will never stop. We*  
31 338 *won’t be able to provide much and we might turn into patients ourselves, so medical staff were*  
32 339 *evaluating how beneficial they can be over there.”* (Interview 3, 2017)  
33 340

### 341 3.5. Health Worker Demoralization

342 The constant attacks to health infrastructure and the barriers to health care access, availability,  
343 and quality that result, impact not only civilians who seek treatment but also the health workers  
344 who provide care. Interviews highlighted a complex constellation of factors that impact health  
345 workers’ day to day working conditions. As this participant described:

346 *“You are working with bad health supplies and instruments, and short of financial support. We*  
347 *also have a great danger of being killed because of the constant bombings. All those factors put*  
348 *a great pressure on doctors... Especially the doctors that work for health organisations and in*  
349 *the opposition areas, they are under focus from the regime.”* (Interview 2, 2014)  
350

351 Conditions remain violent, with participants interviewed following the 2017 chemical attacks  
352 drawing attention to the rising death toll among doctors and enduring sense of fatalism among  
353 those who remain:



1  
2  
3 354 *The past year Dr. [name and date omitted] passed away [exposed to chemical agents while*  
4 355 *treating a patient] and another anesthesiologist passed away. There have been about 5-6 deaths*  
5 356 *from our medical staff within the organization. The truth is that work in the northern countryside*  
6 357 *is considered suicide. (Interview 5, 2017)*  
7  
8 358

9 359 The stress of providing care during war is made worse because of the scarcity of health workers.  
10  
11 360 Many participants reported that they work 24-hour days because there are no other staff to  
12  
13 361 relieve them of their duties. Additionally, participants described often feeling helpless, because  
14  
15 362 of the number of people they could not assist. A participant explained health worker's relentless  
16  
17 363 workload, coupled with the extreme trauma related injuries they respond to:

18 364 *"Sometimes it takes them from 8:00 in the morning till 12:00 in the evening doing operations*  
19 365 *only. And because of the lack of the staff they are obliged to stay in the hospital, moving from*  
20 366 *one operation to another, and sometimes they don't find time to even eat. This pressure they live*  
21 367 *under, and all the casualties they see, all the injuries, the beheaded, the limbs and everything,*  
22 368 *puts them under very heavy pressure." (Interview 20, 2014)*  
23  
24 369

25  
26 370 Participants described the most recent chemical attacks as having a major impact on morale  
27  
28 371 among health workers and their sense of isolation:

29 372 *"Every single life we saved in the last year ended up dead in the chemical attack. At the end,*  
30 373 *death has become normal to the rest of the world, no one is reacting." (Interview 1, 2017)*  
31  
32 374

33 375 *"It had a big effect in creating a hopeless environment, feeling of hopelessness inside each*  
34 376 *healthcare provider." (Interview 3, 2017)*  
35  
36 377

37 378 Participant accounts highlighted the mixed emotions generated by their work, as fear was offset  
38  
39 379 only by a strong sense of professional commitment:

40 380 *"Sometimes we have depression. But all of us believe that we must do this job – but all of us are*  
41 381 *afraid of some point where we're injured or killed..." (Interview 13, 2014)*  
42  
43 382

44 383 In the absence of external support health workers look to one another; here a participant  
45  
46 384 describes how they rejoice on days where their work does not bring with it the death of another  
47  
48 385 colleague:

49 386 *"After a barrel bomb falls we start dancing, the Arabian dancing. We are not dead, and if*  
50 387 *nobody is dead among us, we start dancing." (Interview 23, 2014)*  
51  
52 388

53 389 Finally, another participant pointed to the absence and futility of psychological support and  
54  
55 390 instead the role of their faith:

1  
2  
3 391 *“What is good about psychological support after all what we have seen? In general, we don’t get*  
4 392 *internal nor external psychological support. The staff that held up for 7 years have only God to*  
5 393 *depend on.” (Interview 2, 2017)*  
6  
7 394

## 8 395 **Discussion**

9  
10 396 To the authors’ knowledge, this is the first research study to illuminate the experiences of  
11 397 indigenous health workers in Syria seeking to provide health care to the local population, while  
12 398 themselves under attack. Unlike international aid workers, whose experience have been  
13 399 extensively studied, local doctors, nurses and other health workers who remain in their country to  
14 400 try to relieve suffering have received far less attention in the context of research. This qualitative  
15 401 study of 29 health workers subjected to bombing and chemical attacks provides new insights into  
16 402 the overwhelming challenges they face, their persistence in trying to meet them, and the  
17 403 psychological toll of carrying on. The bombing and chemical attacks have had far reaching  
18 404 implications beyond the observable violence and destruction of health infrastructure. These  
19 405 include the flight of health workers from Syria, even as population needs increase, reluctance of  
20 406 patients to seek needed care in hospitals, and allocation of resources needed for care to protection  
21 407 and security.

22 408 Attacks on hospitals, ambulances, health workers, and the wounded and sick are not  
23 409 uncommon in armed conflict. In 2016, for example, such attacks took place in 23 countries, and  
24 410 bombing and shelling took place in ten of them.<sup>9</sup> Syria is unique, in part because of the number  
25 411 of sustained attacks on hospitals now numbering over 500 over a period of seven years,  
26 412 alongside the rising number of chemical attacks.<sup>37</sup> As has been found in other conflicts,<sup>31,38-40</sup> our  
27 413 findings show that in Syria violence against health care has bred a climate of fear and insecurity,  
28 414 with devastating impacts on health-seeking behaviors and access including, civilian difficulties  
29 415 in reaching medical aid or avoidance of health facilities altogether. Participants described how  
30 416 their work to treat a suffering population was severely impeded by a lack of availability of  
31 417 essential equipment, facilities, and treatments for chronic and infectious disease.

32 418 The challenges of maintaining standards of quality, interconnected to access and  
33 419 availability, was a central theme of the interviews, and constitutes a daily source of pressure and  
34 420 anxiety for those trying to provide care. Health care providers have had to cope with shortages in  
35 421 staff and equipment and overwhelming numbers of patients, rendering triage decisions  
36 422 impossibly hard. The large scale of chemical weapons attacks in facilities already compromised



1  
2  
3 423 by violence against them has overwhelmed medical staffs. Despite efforts by many organisations  
4  
5 424 to provide supplies, equipment, and a safe environment, health workers have been forced to  
6  
7 425 operate in conditions well below any standard of quality that existed prior to the conflict. The  
8  
9 426 chemical attacks in 2017 in particular show the extent to which the use of prohibited weapons  
10  
11 427 and extreme resource limitations impair health worker efforts to provide basic life-saving  
12  
13 428 treatment, and the extreme threats posed to their own safety and wellbeing.

14 429 Organizations supporting medical care in Syria, such as SAMS, have responded to the  
15  
16 430 crisis by providing training to health professionals on trauma care and response to chemical  
17  
18 431 weapons attacks, offering protective equipment, antidotes for chemical attacks, and constructing  
19  
20 432 health facilities underground to protect them from bombs. These efforts, however, inevitably  
21  
22 433 have limited impact in the face of the level of violence inflicted on health facilities and health  
23  
24 434 workers. As one 2014 respondent said when asked what could be done to offer health workers in  
25  
26 435 Syria support, he replied, “*Stop the bombing.*” Only concerted action by the international  
27  
28 436 community through the UN Security Council or otherwise could achieve that, and it has not been  
29  
30 437 forthcoming over seven years of conflict. Research on the effects of the Syrian conflict has  
31  
32 438 described the lasting impact the migration of health workers on health systems and ultimately the  
33  
34 439 civilian population remaining in Syria.<sup>25,28</sup> Accounts from both 2014 and 2017 highlight the  
35  
36 440 continued outward migration of health providers due to violence against them and the  
37  
38 441 psychological toll taken by working in such circumstances. They also reveal how physician  
39  
40 442 shortages have led to the self-training in specializations for which doctors on the ground have no  
41  
42 443 official certification. The need for medical personnel to act beyond their training inevitably has  
43  
44 444 implications for the quality of care patients receive, and puts health providers not adequately  
45  
46 445 trained under enormous pressure.

47 446 Participant accounts are consistent with other evidence, which together reveal that attacks  
48  
49 447 on hospitals and medical providers are targeted and deliberate, and likely constitute war crimes.  
50  
51 448 The data illustrates how violence against health workers and facilities undermined their ability to  
52  
53 449 contribute to the realization of the right to health, which imposes on States a number of core  
54  
55 450 obligations to respect, protect and fulfill the health needs of the population, obligations that are  
56  
57 451 non-derogable, even in times of conflict.<sup>41,42</sup> Syria has ratified the International Covenant on  
58  
59 452 Economic, Social and Cultural Rights, and even though Syria does not control all areas of the  
60  
453 country, it has an obligation both to refrain from taking actions to infringe the right to health and

1  
2  
3 454 take affirmative steps to protect health workers and individuals seeking health care in those  
4  
5 455 regions.<sup>42</sup> Instead, the government is attacking hospitals and health workers, with UN human  
6  
7 456 rights agencies continuing to confirm the severity of its violations of these rights.

8 457 Since we conducted interviews in 2014, attacks on hospitals and health care workers have  
9  
10 458 escalated further with augmented findings from the 2017 chemical attacks illustrative of the  
11  
12 459 severity of conditions on the ground. Chemical weapons have continuously been used by the  
13  
14 460 Syrian government and its allies throughout the conflict, as confirmed by the United Nations  
15  
16 461 chemical weapons watchdog, the Organization for the Prohibition of Chemical Weapons  
17  
18 462 (OPCW).<sup>17</sup> The UN Security Council has repeatedly called on Syria and its allies to adhere to its  
19  
20 463 legal obligation not to attack health facilities and health workers,<sup>43</sup> to no avail, and efforts by  
21  
22 464 members of the Council to refer gross violations of international humanitarian law, including  
23  
24 465 targeting of hospitals and health workers and the use of chemical weapons on civilians, to the  
25  
26 466 International Criminal Court, were either blocked or denied by Russia.

27 467

## 28 468 **Conclusion**

29 469 This study shows the consequences for health practitioners who seek to provide medical  
30  
31 470 care for populations where health systems are subjected to bombings and other forms of  
32  
33 471 violence, including chemical attacks. It is remarkable that doctors and nurses continue to work  
34  
35 472 in conditions of such danger, and how they have carried on despite dire shortages of staff and  
36  
37 473 supplies. While they are resilient, they suffer enormously. The study underlines the  
38  
39 474 consequences to health workers of the failure by the international community to take effective  
40  
41 475 action to protect them from aerial assaults, chemical attacks, and other forms of violence. It  
42  
43 476 further underlines the imperative of taking strong steps to protect health workers in war and to  
44  
45 477 focus on the needs of health professionals who struggle to continue to fulfill the right to health,  
46  
47 478 even while under attack.

48 479 Those needs include: capacity building to respond to chemical attacks (including  
49  
50 480 provision of correct antidotes and protective gear); removing barriers to accessing professional  
51  
52 481 training (including continuing education abroad); and research informed trainings delivered  
53  
54 482 remotely to ensure the provision of appropriately equipped psychologists and mental health  
55  
56 483 supporters to provide care to healthcare workers. Finally, future research should continue to

1  
2  
3 484 evaluate the staggering challenges faced by Syria's health professionals, affording them the  
4 opportunity to share their experience and knowledge.  
5 485  
6 486

### 8 487 **Limitations**

10 488 The findings are subject to a number of limitations. Firstly, there is the potential for respondent  
11 489 bias (e.g., specific geographic experience or gendered framing) due to a number of factors  
12 490 constraining the pool of available participants. The majority of participants were in Gaziantep for  
13 491 SAMS trainings in October 2014, and therefore data are limited to the experiences of a sample of  
14 492 health workers, collected within a short five-day period, and then later in 2017 to those with  
15 493 specific knowledge of the chemical attacks. Furthermore, most participants were male despite  
16 494 outreach to both male and female health professionals currently inside Syria. This is mainly due  
17 495 to the scarcity of female health professionals attending the 2014 trainings (which includes  
18 496 cultural barriers and travel concerns for women from Syria into Turkey) and the lack of female  
19 497 representatives recommended to interview after the chemical attacks in 2017. To address this  
20 498 concern, future research on healthcare providers inside Syria should aim to include female health  
21 499 workers as well as interview questions that address gender-specific challenges among healthcare  
22 500 workers inside Syria. Additionally, the situation in northwest Syria has changed and worsened  
23 501 since this data was collected. For this reason and to reflect more recent events the research team  
24 502 were able to include updated data from health workers working in Syria in 2017. Finally, these  
25 503 findings do not apply to areas of the country controlled by the Islamic State or to government-  
26 504 controlled areas. In government-controlled areas, the health system is understood to be largely  
27 505 intact, though capacity is variable, and the impact of the war can be felt through indiscriminate  
28 506 mortar attacks, emigration of senior physicians, travel restrictions and inconsistent supplies.<sup>30</sup>  
29 507 However, access of information in these areas is extremely limited for researchers on-the-ground  
30 508 and was beyond the scope of this study. Despite these limitations, collectively accounts provide  
31 509 an opportunity to learn more in-depth details of the experiences of health workers operating in  
32 510 the Syrian conflict, to understand challenges to health care provision, and to consider ways in  
33 511 which research can begin to support these providers.  
34  
35  
36  
37  
38  
39  
40  
41  
42  
43  
44  
45  
46  
47  
48  
49  
50  
51  
52

### 53 513 *Acknowledgements*

54  
55  
56  
57  
58  
59  
60

1  
2  
3 514 We would like to sincerely thank the dedicated health care workers in Syria for sharing their  
4  
5 515 experiences for this research and to the Syrian American Medical Society for facilitating this  
6  
7 516 research. The content is solely the responsibility of the authors and does not represent official  
8  
9 517 views of the Society. The authors also thank Matthew Murray and Nicholas Degner for their  
10  
11 518 contributions to the project.

12 519

13 520 *Author's contributions*

14  
15 521 KF and LR designed and conceptualized the study. LR, DR and ZS coordinated and carried out  
16  
17 522 data collection. KF, EC and LR analyzed and interpreted the data. KF led manuscript writing  
18  
19 523 with contributions from LR and EC. All authors reviewed the final manuscript.

20 524

21  
22 525  
23  
24  
25  
26  
27  
28  
29  
30  
31  
32  
33  
34  
35  
36  
37  
38  
39  
40  
41  
42  
43  
44  
45  
46  
47  
48  
49  
50  
51  
52  
53  
54  
55  
56  
57  
58  
59  
60

1  
2  
3 5264  
5 5276  
7 528 *Competing Interest*

8 529 The authors declare the following competing competing interests. Dr. Rubenstein reports grants  
9 530 from MacArthur Foundation for the conduct of the study; grants from Oak Foundation, grants  
10 531 from JK Kellogg Foundation, grants from Polak-Mainz Stichting, outside the submitted  
11 532 work; and Chair, Safeguarding Health in Conflict Coalition.

12  
13 53314  
15 534 *Funding*

16 535 Funding for the study was provided by the MacArthur Foundation. The views and opinions  
17 536 expressed in this article are those of the authors and not necessarily those of the MacArthur  
18 537 Foundation who were not involved in any step in the design, collection, analysis, or writing of  
19 538 this manuscript.

20  
21 53922  
23 540 *BMJ Author License*

24 541 “I *Katherine Footer* The Corresponding Author of this article contained within the original  
25 542 manuscript which includes any diagrams & photographs within and any related or stand alone  
26 543 film submitted (the Contribution”) has the right to grant on behalf of all authors and does grant  
27 544 on behalf of all authors, a licence to the BMJ Publishing Group Ltd and its licencees, to permit  
28 545 this Contribution (if accepted) to be published in the BMJ and any other BMJ Group products  
29 546 and to exploit all subsidiary rights, as set out in our licence set out at:  
30 547 [http://www.bmj.com/about-bmj/resources-authors/forms-policies-and-checklists/copyright-open-](http://www.bmj.com/about-bmj/resources-authors/forms-policies-and-checklists/copyright-open-access-and-permission-reuse)  
31 548 [access-and-permission-reuse.](http://www.bmj.com/about-bmj/resources-authors/forms-policies-and-checklists/copyright-open-access-and-permission-reuse)”

32  
33 54934  
35 550 *Transparency declaration*

36 551 The lead author\* *Katherine Footer* affirms that this manuscript is an honest, accurate, and  
37 552 transparent account of the study being reported; that no important aspects of the study have been  
38 553 omitted; and that any discrepancies from the study as planned (and, if relevant, registered) have  
39 554 been explained.

40  
41 55542  
43 556 *Data Sharing Statement:* All available data can be obtained from the corresponding author.

## 557 REFERENCES

- 558 1. Amnesty International. *Syria: The worst humanitarian crisis of our time*. 2015.
- 559 2. Fouad FM, Sparrow A, Tarakji A, et al. Health workers and the weaponisation of health  
560 care in Syria: a preliminary inquiry for The Lancet-American University of Beirut  
561 Commission on Syria. *The Lancet*.390(10111):2516-2526.
- 562 3. International Committee of the Red Cross. Ambulances and Pre-hospital services in Risk  
563 Situations. 2013; <https://www.icrc.org/eng/assets/files/publications/icrc-002-4104.pdf>
- 564 4. International Committee of the Red Cross. Ensuring the Preparedness and Security of  
565 Health Care Facilities in Armed Conflicts and Other Emergencies. 2015;  
566 <https://www.icrc.org/eng/assets/files/publications/icrc-002-4239.pdf>.
- 567 5. Abu Sa'Da C, Duroch, F., Taithe, B. Attacks on medical missions: Overview of a  
568 polymorphous reality: The case of Médecins Sans Frontières. *International Review of the*  
569 *Red Cross*. 2013;95(890):309-330.
- 570 6. Physicians for Human Rights. *Beyond Imagination: Seven Years of Conflict in Syria*.  
571 2018.
- 572 7. Chulov M, Shaheen, K., . Syrian medics 'subjected to extreme intimidation' after Douma  
573 attack. *The Guardian*2018.
- 574 8. Physicians for Human Rights. Anatomy of Crisis: a map of attacks in health care in Syria.  
575 [https://s3.amazonaws.com/PHR\\_syria\\_map/web/index.html](https://s3.amazonaws.com/PHR_syria_map/web/index.html). Accessed 17 March 2016.
- 576 9. Safeguarding Health in Conflict. *IMPUNITY MUST END: Attacks on Health in 23*  
577 *Countries in Conflict in 2016*. 2017.
- 578 10. Human Rights Watch. *Hospitals, Health Workers Under Attack: UN Security Council*  
579 *Should Strengthen Call for Justice*. 2017.
- 580 11. Medecins Sans Frontiers. *Syria: Healthcare is being annihilated amid intensified*  
581 *bombings in Syria's north-west*. 2017.
- 582 12. World Health Organization. *Report on Attacks on Health Care in Emergencies: Based on*  
583 *Consolidated Secondary Data 2014 and 2015*. 2016.
- 584 13. Office of the United Nations High Commissioner for Human Rights. *Syria: Deliberate*  
585 *deprivation of right to life, health*. 2016.
- 586 14. UN News. *Syria: UN 'gravely concerned' over repeated attacks on hospitals, school*.  
587 2016.
- 588 15. World Health Organization East Mediterranean Regional Office. *Regional Situation*  
589 *Report, June 2014*. 2014.
- 590 16. World Health Organization Regional Office for the Eastern Mediterranean. *Regional*  
591 *SitRep, September 2014 WHO Response to the Syrian Crisis*. 2014.
- 592 17. Organisation for the Prohibition of Chemical Weapons. *OPCW Fact-Finding Mission*  
593 *Confirms Use of Chemical Weapons in Khan Shaykhun on 4 April 2017*. 2017.
- 594 18. Physicians for Human Rights. *Combating Impunity: How We Risk Normalizing Chemical*  
595 *Weapons Attacks and Other War Crimes in Syria*. 2018.
- 596 19. United Nations Human Rights Council. *Press statement on the alleged use of chemical*  
597 *weapons in eastern Ghouta*. 2018.
- 598 20. Syrian American Medical Society. *A New Normal: Ongoing Chemical Weapons Attacks*  
599 *in Syria*. 2016.
- 600 21. Human Rights Watch. *Death by Chemicals: The Syrian Government's Widespread and*  
601 *Systematic Use of Chemical Weapons*. 2017.



- 1  
2  
3 602 22. Coutts A, Fouad FM, Abbara A, Sibai AM, Sahloul Z, Blanchet K. Responding to the  
4 603 Syrian health crisis: the need for data and research. *The Lancet Respiratory medicine*.  
5 604 2015;3(3):e8-9.  
6 605 23. Syrian American Medical Society. About SAMS. [https://www.sams-usa.net/who-we-](https://www.sams-usa.net/who-we-are/)  
7 606 [are/](https://www.sams-usa.net/who-we-are/). Accessed 24 April 2018.  
8 607 24. Physicians for Human Rights. *Doctors in the Crosshairs: Four Years of Attacks on*  
9 608 *Health Care in Syria*. 2015.  
10 609 25. Kherallah M, Alahfez T, Sahloul Z, Eddin KD, Jamil G. Health care in Syria before and  
11 610 during the crisis. *Avicenna Journal of Medicine*. 2012;2(3):51-53.  
12 611 26. World Health Organization. *Regional Situation Report, November 2015*.  
13 612 27. Aylward RB, Alwan A. Polio in syria. *Lancet*. 2014;383(9916):489-491.  
14 613 28. Cousins S. Syrian crisis: health experts say more can be done. *Lancet*.  
15 614 2015;385(9972):931-934.  
16 615 29. Devakumar D, Birch M, Rubenstein LS, Osrin D, Sondorp E, Wells JC. Child health in  
17 616 Syria: recognising the lasting effects of warfare on health. *Confl Health*. 2015;9:34.  
18 617 30. United Nations Human Rights Council. *Independent International Commission on the*  
19 618 *Syrian Arab Republic: Assault on Medical Care in Syria*. 2013.  
20 619 31. Footer KR, L. A human rights approach to health care in conflict. *International Review of*  
21 620 *the Red Cross*. 2013;95(889):167-187.  
22 621 32. Breittiger A. The legal framework applicable to insecurity and violence affecting the  
23 622 delivery of health care in armed conflicts and other emergencies. . *International Rev of*  
24 623 *the Red Cross* 2013;95(889):83-127.  
25 624 33. Geneva Convention (IV) relative to the Protection of Civilian Persons in Time of War.  
26 625 Geneva 1949.  
27 626 34. Protocols additional to the Geneva Conventions of 12 August 1949.  
28 627 35. United Nations Committee on Economic Social and Cultural Rights (CESCR). *General*  
29 628 *Comment No. 14: The Right to the Highest Attainable Standard of Health (Art. 12 of the*  
30 629 *Covenant)*. UN Committee on Economic, Social and Cultural Rights (CESCR),; 11  
31 630 August 2000 2000.  
32 631 36. Syrian American Medical Society. SAMS Medical Training for Syrian Healthcare  
33 632 Workers. <https://www.sams-usa.net/medical-education-training/>. Accessed 24 April  
34 633 2018.  
35 634 37. Rodriguez-Llanes JM, et al. . Epidemiological findings of major chemical attacks in the  
36 635 Syrian war are consistent with civilian targeting: a short report. *Conflict and Health*.  
37 636 2018;12(16).  
38 637 38. Footer KH, Meyer S, Sherman SG, Rubenstein L. On the frontline of eastern Burma's  
39 638 chronic conflict--listening to the voices of local health workers. *Soc Sci Med*.  
40 639 2014;120:378-386.  
41 640 39. Save the Children Watchlist on Children and Armed Conflict. *Every Clinic is Now on the*  
42 641 *Frontline: The Impact on Children of Attacks on Health Care in Afghanistan*. 2016.  
43 642 40. Save the Children Watchlist on Children and Armed Conflict. "Every Day Things are  
44 643 Getting Worse" *The Impact on Children of Attacks on Healthcare in Yemen*. 2017.  
45 644 41. International Red Cross and Red Crescent Movement. Health Care in Danger Project.  
46 645 <http://healthcareindanger.org/hcid-project/>. Accessed 1 December 2016.

- 1  
2  
3 646 42. United Nations General Assembly. Report of the Special Rapporteur on the right of  
4 647 everyone to the enjoyment of the highest attainable standard of physical and mental  
5 648 health. 2013.  
6 649 43. United Nations Security Council. *Resolution 2258*. 2015.  
7 650  
8  
9  
10  
11  
12  
13  
14  
15  
16  
17  
18  
19  
20  
21  
22  
23  
24  
25  
26  
27  
28  
29  
30  
31  
32  
33  
34  
35  
36  
37  
38  
39  
40  
41  
42  
43  
44  
45  
46  
47  
48  
49  
50  
51  
52  
53  
54  
55  
56  
57  
58  
59  
60



## Standards for Reporting Qualitative Research (SRQR)\*

<http://www.equator-network.org/reporting-guidelines/srqr/>

Page/line no(s).

### Title and abstract

|                                                                                                                                                                                                                                                              |       |
|--------------------------------------------------------------------------------------------------------------------------------------------------------------------------------------------------------------------------------------------------------------|-------|
| <p><b>Title</b> - Concise description of the nature and topic of the study Identifying the study as qualitative or indicating the approach (e.g., ethnography, grounded theory) or data collection methods (e.g., interview, focus group) is recommended</p> | Pg. 1 |
| <p><b>Abstract</b> - Summary of key elements of the study using the abstract format of the intended publication; typically includes background, purpose, methods, results, and conclusions</p>                                                               | Pg. 6 |

### Introduction

|                                                                                                                                                                     |         |
|---------------------------------------------------------------------------------------------------------------------------------------------------------------------|---------|
| <p><b>Problem formulation</b> - Description and significance of the problem/phenomenon studied; review of relevant theory and empirical work; problem statement</p> | Pg. 7-8 |
| <p><b>Purpose or research question</b> - Purpose of the study and specific objectives or questions</p>                                                              | Pg. 4   |

### Methods

|                                                                                                                                                                                                                                                                                                                                                                                                             |         |
|-------------------------------------------------------------------------------------------------------------------------------------------------------------------------------------------------------------------------------------------------------------------------------------------------------------------------------------------------------------------------------------------------------------|---------|
| <p><b>Qualitative approach and research paradigm</b> - Qualitative approach (e.g., ethnography, grounded theory, case study, phenomenology, narrative research) and guiding theory if appropriate; identifying the research paradigm (e.g., postpositivist, constructivist/ interpretivist) is also recommended; rationale**</p>                                                                            | Pg. 4   |
| <p><b>Researcher characteristics and reflexivity</b> - Researchers' characteristics that may influence the research, including personal attributes, qualifications/experience, relationship with participants, assumptions, and/or presuppositions; potential or actual interaction between researchers' characteristics and the research questions, approach, methods, results, and/or transferability</p> | Pg. 3-4 |
| <p><b>Context</b> - Setting/site and salient contextual factors; rationale**</p>                                                                                                                                                                                                                                                                                                                            | Pg. 3   |
| <p><b>Sampling strategy</b> - How and why research participants, documents, or events were selected; criteria for deciding when no further sampling was necessary (e.g., sampling saturation); rationale**</p>                                                                                                                                                                                              | Pg. 3-4 |
| <p><b>Ethical issues pertaining to human subjects</b> - Documentation of approval by an appropriate ethics review board and participant consent, or explanation for lack thereof; other confidentiality and data security issues</p>                                                                                                                                                                        | Pg. 4-5 |
| <p><b>Data collection methods</b> - Types of data collected; details of data collection procedures including (as appropriate) start and stop dates of data collection and analysis, iterative process, triangulation of sources/methods, and modification of procedures in response to evolving study findings; rationale**</p>                                                                             | Pg. 4   |

|                       |                                                                                                                                                                                                                                                       |       |
|-----------------------|-------------------------------------------------------------------------------------------------------------------------------------------------------------------------------------------------------------------------------------------------------|-------|
| 1<br>2<br>3<br>4<br>5 | <b>Data collection instruments and technologies</b> - Description of instruments (e.g., interview guides, questionnaires) and devices (e.g., audio recorders) used for data collection; if/how the instrument(s) changed over the course of the study | Pg. 4 |
| 6<br>7<br>8           | <b>Units of study</b> - Number and relevant characteristics of participants, documents, or events included in the study; level of participation (could be reported in results)                                                                        | Pg. 5 |
| 9<br>10<br>11<br>12   | <b>Data processing</b> - Methods for processing data prior to and during analysis, including transcription, data entry, data management and security, verification of data integrity, data coding, and anonymization/de-identification of excerpts    | Pg. 4 |
| 13<br>14<br>15<br>16  | <b>Data analysis</b> - Process by which inferences, themes, etc., were identified and developed, including the researchers involved in data analysis; usually references a specific paradigm or approach; rationale**                                 | Pg. 4 |
| 17<br>18<br>19<br>20  | <b>Techniques to enhance trustworthiness</b> - Techniques to enhance trustworthiness and credibility of data analysis (e.g., member checking, audit trail, triangulation); rationale**                                                                | Pg. 4 |

## Results/findings

|                      |                                                                                                                                                                                                   |           |
|----------------------|---------------------------------------------------------------------------------------------------------------------------------------------------------------------------------------------------|-----------|
| 23<br>24<br>25<br>26 | <b>Synthesis and interpretation</b> - Main findings (e.g., interpretations, inferences, and themes); might include development of a theory or model, or integration with prior research or theory | Pg. 16-18 |
| 27<br>28<br>29       | <b>Links to empirical data</b> - Evidence (e.g., quotes, field notes, text excerpts, photographs) to substantiate analytic findings                                                               | N/A       |

## Discussion

|                                  |                                                                                                                                                                                                                                                                                                                                                                                                             |           |
|----------------------------------|-------------------------------------------------------------------------------------------------------------------------------------------------------------------------------------------------------------------------------------------------------------------------------------------------------------------------------------------------------------------------------------------------------------|-----------|
| 32<br>33<br>34<br>35<br>36<br>37 | <b>Integration with prior work, implications, transferability, and contribution(s) to the field</b> - Short summary of main findings; explanation of how findings and conclusions connect to, support, elaborate on, or challenge conclusions of earlier scholarship; discussion of scope of application/generalizability; identification of unique contribution(s) to scholarship in a discipline or field | Pg. 17-18 |
| 38<br>39                         | <b>Limitations</b> - Trustworthiness and limitations of findings                                                                                                                                                                                                                                                                                                                                            | Pg. 16-17 |

## Other

|                |                                                                                                                                               |        |
|----------------|-----------------------------------------------------------------------------------------------------------------------------------------------|--------|
| 42<br>43<br>44 | <b>Conflicts of interest</b> - Potential sources of influence or perceived influence on study conduct and conclusions; how these were managed | Pg. 19 |
| 45<br>46       | <b>Funding</b> - Sources of funding and other support; role of funders in data collection, interpretation, and reporting                      | Pg.19  |

\*The authors created the SRQR by searching the literature to identify guidelines, reporting standards, and critical appraisal criteria for qualitative research; reviewing the reference lists of retrieved sources; and contacting experts to gain feedback. The SRQR aims to improve the transparency of all aspects of qualitative research by providing clear standards for reporting qualitative research.

1  
2  
3  
4  
5  
6  
7  
8  
9  
10  
11  
12  
13  
14  
15  
16  
17  
18  
19  
20  
21  
22  
23  
24  
25  
26  
27  
28  
29  
30  
31  
32  
33  
34  
35  
36  
37  
38  
39  
40  
41  
42  
43  
44  
45  
46  
47  
48  
49  
50  
51  
52  
53  
54  
55  
56  
57  
58  
59  
60

\*\*The rationale should briefly discuss the justification for choosing that theory, approach, method, or technique rather than other options available, the assumptions and limitations implicit in those choices, and how those choices influence study conclusions and transferability. As appropriate, the rationale for several items might be discussed together.

**Reference:**

O'Brien BC, Harris IB, Beckman TJ, Reed DA, Cook DA. **Standards for reporting qualitative research: a synthesis of recommendations.** *Academic Medicine*, Vol. 89, No. 9 / Sept 2014  
DOI: [10.1097/ACM.0000000000000388](https://doi.org/10.1097/ACM.0000000000000388)

For peer review only
